# Supplementary material for: The nuclear genome of Rhazya stricta and the evolution of alkaloid diversity in a medically relevant clade of Apocynaceae
Source: PubMed Central journal article supplement (PMC5031960; doi:10.1038/srep33782), 2016-09-22

**The nuclear genome of *Rhazya stricta* and the evolution of alkaloid diversity in a medically relevant clade of Apocynaceae**

Jamal S.M. Sabir<sup>1†</sup>, Robert K. Jansen<sup>1,2†</sup>, Dhivya Arasappan<sup>2</sup>, Virginie Calderon<sup>3</sup>, Emmanuel Noutahi<sup>3</sup>, Chunfang Zheng<sup>4</sup>, Seongjun Park<sup>2</sup>, Meshaal J. Sabir<sup>1</sup>, Mohammed N. Baeshen<sup>9</sup>, Nahid H Hajrah<sup>1</sup>, Mohammad A. Khiyami<sup>5</sup>, Nabih A. Baeshen<sup>6</sup>, Abdullah Y. Obaid<sup>7</sup>, Abdulrahman L. Al-Malki<sup>8</sup>, David Sankoff<sup>4</sup>, Nadia El-Mabrouk<sup>3</sup> and Tracey A. Ruhlman<sup>2\*</sup>

**Supplementary Information\_SREP-16-05184**

Supplementary Table S1: Data generated for genome assembly

Supplementary Table S2: Improvement of assembly with PacBio and optical mapping.

Supplementary Table S3: OpGen whole genome map statistics.

Supplementary Table S4: Comparison of assembly statistics for four plant nuclear genomes.

Supplementary Table S5: Coding sequence annotation for *Rhazya* nuclear genome.

Supplementary Table S6: Repeated sequences of the *Rhazya* nuclear genome.

Supplementary Table S7: Query sequences used in homolog search.

Supplementary Table S8: Results from reconciliation with different bootstraps cut-off, all possible roots. Results obtained after manual filtering considering both likelihood and reconciliation cost.

Supplementary Table S9: Monoterpenoid indole alkaloids (MIA) isolated from *Rhazya stricta*. Extracts from young *R. stricta* leaves were evaluated for MIA content by mass spectrometry.

Supplementary Text S1. Extended methods for genome assembly and annotation.

Supplementary Figures and Legends S1-S3.

Supplementary Table S1: Data generated for genome assembly

| <b>Technology</b> | <b>Library type</b>  | <b>Insert size (bp)</b> | <b>Read length (bp)</b> | <b>Number of reads</b> |
|-------------------|----------------------|-------------------------|-------------------------|------------------------|
| Illumina          | Fragment             | 160-220                 | 100                     | 291,361,582            |
| Illumina          | Mate-pair            | 3,000                   | 100                     | 78,042,292             |
| Illumina          | Mate-pair            | 6,000                   | 100                     | 26,102,232             |
| PacBio            | Continuous long read | 10,000                  | 50-22,603               | 579,535                |

bp=base pairs

Supplementary Table S2: Improvement of assembly with PacBio and optical mapping.

| <b>Refinement steps</b>                                         | <b>Nnumber of scaffolds</b> | <b>N50</b> | <b>Max length</b> | <b>Scaffolds &gt;200KB</b> |                              |
|-----------------------------------------------------------------|-----------------------------|------------|-------------------|----------------------------|------------------------------|
|                                                                 |                             |            |                   | <b>count</b>               | <b>% of assembly (274Mb)</b> |
| Assembled Illumina reads                                        | 1449                        | 1,061,426  | 4,551,498         | n.a.                       | n.a.                         |
| Scaffolding with PacBio (AHA), Close gaps with PacBio (PBjelly) | 1099                        | 1,445,001  | 6,923,550         | 232                        | 93                           |
| Merge large scaffolds with optical mapping                      | 980                         | 5,554,218  | 16,403,306        | 113                        | 93                           |

Mb= megabases

Supplementary Table S3: OpGen whole genome map statistics. Data provided by OpGen.

| <b>Summary of SMRM data</b>    | <b>Maps used in analysis</b> |
|--------------------------------|------------------------------|
| Total size (Mb)                | 104,229.97                   |
| Number of molecules            | 291,892                      |
| Average size of molecules (kb) | 357.08                       |
| Minimum molecule size (kb)     | 250                          |
| Average size of fragments (kb) | 14.94                        |

Mb= megabases, kb= kilobases

Supplementary Table S4: Comparison of assembly statistics for four plant nuclear genomes.

| <b>Taxon</b>     | <b>Genome size estimate (Mb)</b> | <b>No. of scaffolds</b> | <b>Assembly size</b> | <b>Scaffold N50 (Mb)</b> |
|------------------|----------------------------------|-------------------------|----------------------|--------------------------|
| <b>Coffea</b>    | 710                              | 13,345                  | 568.6                | 1.26                     |
| <b>Cacao</b>     | 430                              | 4,792                   | 326.9                | 0.47                     |
| <b>Amborella</b> | 870                              | 5,745                   | 706.0                | 4.9                      |
| <b>Rhazya</b>    | 200                              | 980                     | 274.0                | 5.5                      |

Mb=megabases

Supplementary Table S5: Coding sequence annotation for *Rhazya* nuclear genome.

|                                                         |               |
|---------------------------------------------------------|---------------|
| <b>Number of genes in filtered list</b>                 | <b>17,041</b> |
| <b>Additional SNAP genes added to the filtered list</b> | <b>4,123</b>  |
| <b>Total</b>                                            | <b>21,164</b> |
| <b>Number of exons</b>                                  | 107,181       |
| <b>Number of CDS</b>                                    | 104,172       |
| <b>Average gene size (bp)</b>                           | 4,452         |
| <b>Average number of exons per gene</b>                 | 6.29          |

bp=base pairs

Supplementary Table S6: Repeated sequence estimate for the *Rhazya* nuclear genome.

| Class                   | Order | Superfamily | Number of elements | Sequence Occupied (bp) | Proportion of genome |
|-------------------------|-------|-------------|--------------------|------------------------|----------------------|
|                         |       | Copia       | 19,698             | 15,260,318             | 5.6%                 |
|                         |       | Gypsy       | 29,986             | 18,810,088             | 6.9%                 |
| Retro transposons       | LTR   | DIRS        | 120                | 7,332                  | >0.01%               |
|                         |       | ERV         | 864                | 56,368                 | >0.01%               |
|                         |       | Others      | 8,690              | 5,072,218              | 1.8%                 |
|                         | LINE  |             | 4,060              | 682,122                | 0.2%                 |
|                         | SINE  |             | 230                | 17,004                 | >0.01%               |
| DNA transposons         | TIR   | Tc1-Mariner | 1,126              | 200,788                | 0.1%                 |
|                         |       | hAT         | 2,492              | 877,146                | 0.3%                 |
|                         |       | Harbinger   | 676                | 172,602                | 0.1%                 |
|                         |       | Others      | 7,314              | 1524,456               | 0.6%                 |
| Low complexity sequence |       |             | 227,112            | 10,959,376             | 4.0%                 |
| Total                   |       |             |                    | 55498610               | 20.2%*               |

\*This list of repeated elements is not exhaustive and the actual value for repeat content is likely higher. bp=base pairs, LTR=long terminal repeats, LINE= Long interspersed elements, SINE=Short interspersed elements, TIR= Terminal Inverted Repeats

Supplementary Table S7. Query sequences used in homolog search.

| <b>SYMBOL</b> | <b>FULL NAME</b>                                                | <b>*IntEnz</b> | <b>SOURCE</b> | <b>ACCESSION</b>     | <b>FIG#</b> |
|---------------|-----------------------------------------------------------------|----------------|---------------|----------------------|-------------|
| <b>AAE</b>    | Acetylajmaline esterase                                         | EC 3.1.1.80    | RSA           | Q3MKY2               | ED_2c       |
| <b>SGD</b>    | Strictosidine beta-glucosidase                                  | EC 3.2.1.105   | CRA<br>RSA    | AAF28800<br>Q8GU20   | ED_2n       |
| <b>PNAE</b>   | Polyneuridine aldehyde esterase                                 | EC 3.1.1.78    | RSA           | Q9SE93               | ED_2j       |
| <b>STR</b>    | Strictosidine synthase                                          | EC 4.3.3.2     | CRA<br>RSA    | P18417<br>P68175     | ED_2p       |
| <b>T16H</b>   | Tabersonine 16-hydroxylase_CYP71D12                             | EC 1.14.13.73  | CRA           | P98183               | ED_2q       |
| <b>THAS</b>   | tetrahydroalstonine synthase                                    | EC 1.1.1       | CRA           | AKF02528             | ED_2t       |
| <b>VS</b>     | Vinorine synthase<br>70%VS homolog_cathcyc                      | EC 2.3.1.160   | RSA<br>CRA    | Q70PR7<br>GK13-15088 | ED_2u       |
| <b>D4H</b>    | deacetoxyvindoline 4-hydroxylase                                | EC 1.14.11.20  | CRA           | O04847               | ED_2e       |
| 7DLS          | 7-deoxyloganic acid hydroxylase_CYP72A224                       | EC 1.14.13     | CRA           | AHK60834             | ED_2a       |
| 160MT         | Tabersonine 16-hydroxylase_CYP71D12                             | EC 1.14.13.73  | CRA           | P98183               | ED_2b       |
| DAT           | Deacetylvindoline O-acetyltransferase                           | EC 2.3.1.107   | CRA           | Q9ZTK5               | ED_2d       |
| G10H          | Geraniol 8-hydroxylase_CYP76B6 <sup>†</sup>                     | EC 1.14.13.152 | CRA           | Q8VWZ7               | ED_2f       |
| LAMT          | Loganate O-methyltransferase                                    | EC 2.1.1.50    | CRA           | AGX93063             | ED_2g       |
| MAT           | Minovincinine 19-hydroxy-O-acetyltransferase                    | EC 2.3.1       | CRA           | AAO13736             | ED_2h       |
| NMT           | 16-hydroxy-2,3-dihydro-3-hydroxytabersonine n-methyltransferase | EC 2.1.1.99    | CRA           | AHH33092             | ED_2i       |
| PR            | Perakine reductase                                              | EC 1.1.1.317   | RSA           | AAX11684             | ED_2k       |
| PRX1          | Peroxidase 1                                                    | EC 1.11.1      | CRA           | CAJ84723             | ED_2l       |
| RO            | Reticuline oxidase                                              | EC 1.21.3.3    | CRA           | AKF02526             | ED_2v       |
| TDC           | Tryptophan decarboxylase                                        | EC 4.1.1.27    | CRA           | P17770               | ED_2s       |
| SLS           | Secologanin synthase_CYP72A1                                    | EC 1.3.3.9     | CRA           | Q05047               | ED_2o       |
| T19H          | Tabersonine/lochnericine 19-hydroxylase_CYP71BJ1                | EC 1.14.13     | CRA           | ADZ48681             | ED_2r       |

\*<http://www.ebi.ac.uk/intenz/query?cmd=SearchEC&ec=3.2.1.105>.

<sup>†</sup>Gene CYP76B6 encodes a protein with alternate names (Geraniol 8-hydroxylase and 10-hydroxylase).

CRA=*Catharanthus roseus*, RSA=*Rauvolfia serpentina*

Supplementary Table S8: Results from reconciliation with different bootstrap cut-offs and all possible roots. Results obtained after manual filtering considering both likelihood and reconciliation cost.

| Query       | All possible roots |       | Number of solutions | Lowest reconciliation cost | Reference figure |
|-------------|--------------------|-------|---------------------|----------------------------|------------------|
|             | Dup                | loss  |                     |                            |                  |
| <b>AAE</b>  | 26                 | 7-11  | 11                  | 33                         | ED_3a            |
| <b>D4E</b>  | 20-21              | 14-17 | 10                  | 34                         | ED_3b            |
| <b>PNAE</b> | 16-18              | 3-11  | 12                  | 23                         | ED_3c            |
| <b>SGD</b>  | 27                 | 25-29 | 12                  | 52                         | ED_3d            |
| <b>STR</b>  | 28-29              | 20-25 | 13                  | 48                         | ED_3e            |
| <b>T16H</b> | 26                 | 14-21 | 9                   | 40                         | ED_3f            |
| <b>THAS</b> | 11                 | 13-20 | 13                  | 24                         | FIG 3            |
| <b>VS</b>   | 11                 | 6-13  | 11                  | 19                         | ED_3g            |

Dup=duplications, query abbreviations are expanded in Supplementary Table S7.

Supplementary Table S9: Monoterpenoid indole alkaloids isolated from *Rhazya stricta* leaves

| #ID / | Structure                                                                           | Name                | FW       |
|-------|-------------------------------------------------------------------------------------|---------------------|----------|
| 1     | 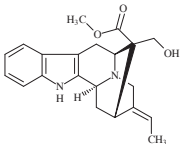   | Akuammidine         | 352.4269 |
| 2     |    | Antirhine           | 296.4067 |
| 3     |    | 3-epi-Antirhine     | 296.4067 |
| 4     |    | Aspidosespermidine  | 282.4231 |
| 5     |    | Condyllocarpine     | 322.4009 |
| 6     |  | dihydrocorynantheol | 298.4225 |
| 7     |  | eburnamenine        | 278.3914 |
| 8     |  | eburnamine          | 296.4067 |
| 9     |  | Eburnamonine        | 294.3908 |
| 10    |  | geissoschizine      | 352.4269 |
| 11    |  | Isositsirikine      | 354.4427 |



| #ID / | Structure                                                                           | Name                    | FW       |
|-------|-------------------------------------------------------------------------------------|-------------------------|----------|
| 12    | 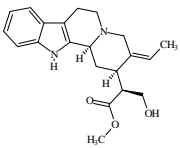   | 16-epi-Z-isositsirikine | 354.4427 |
| 13    |    | leuconolam              | 326.3896 |
| 14    |    | rhazinilam              | 294.3908 |
| 15    |    | tetrahydrosecamine      | 680.9184 |
| 16    |    | presecamine             | 676.8867 |
| 17    |  | sewarine                | 338.4003 |
| 18    |  | Stemmadenine            | 354.4427 |
| 19    |  | strictamine             | 322.4009 |
| 20    |  | strictosamide           | 498.5250 |
| 21    |  | strictosidine           | 530.5669 |
| 22    |  | tabersonine             | 336.4275 |

| #ID / | Structure                                                                           | Name                           | FW       |
|-------|-------------------------------------------------------------------------------------|--------------------------------|----------|
| 23    | 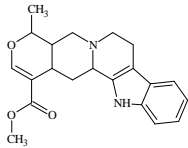   | Tetrahydroalstonine            | 352.4269 |
| 24    |    | vallesiachotamine              | 350.4110 |
| 25    |    | Aspidospermiase                | 428.5213 |
| 26    |    | Bhimberine                     | 354.4427 |
| 27    |   | Bhimbrine N-Oxide              | 370.4421 |
| 28    |  | Rhazimine                      | 350.4110 |
| 29    |  | Rhazimanine                    | 354.4427 |
| 30    |  | Rhazicine                      | 368.4263 |
| 31    |  | Leepacine                      | 350.4110 |
| 32    |  | 2-Methoxy-1,2-Dihydrorhazimine | 382.4528 |
| 33    |  | HR-1                           | 370.4421 |

| #ID / | Structure | Name                                  | FW       |
|-------|-----------|---------------------------------------|----------|
| 34    |           | Vincanicine                           | 322.4009 |
| 35    |           | Rhazinaline                           | 350.4110 |
| 36    |           | beta-Sitosterol                       | 414.7067 |
| 37    |           | Ursolic acid                          | 456.7003 |
| 38    |           | Stigmasterol                          | 412.6908 |
| 39    |           | Oleanolic acid                        | 456.7003 |
| 40    |           | Rhazidigenine (Rhazidine, Strictanol) | 298.4225 |
| 41    |           | N-methylleuconolam                    | 340.4162 |
| 42    |           | (+)-Quebrachamine                     | 282.4231 |
| 43    |           | Polyneuridine                         | 350.4110 |
| 44    |           | (+)-Vincadiforimine                   | 338.4433 |

| #ID / | Structure                                                                           | Name                  | FW       |
|-------|-------------------------------------------------------------------------------------|-----------------------|----------|
| 45    | 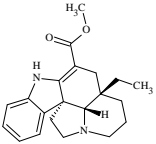   | (-)-Vincadifformine   | 338.4433 |
| 46    |    | Secamine              | 676.8867 |
| 47    |    | Vincadine             | 340.4592 |
| 48    |    | bis-strictidine       | 558.7986 |
| 49    |    | 3,14-dehydrorhazigine | 616.8347 |
| 50    |  | 16-hydrorhazisidine   | 634.8500 |
| 51    |  | rhazisidine           | 614.8188 |
| 52    |  | Isorhazicine          | 368.4263 |
| 53    |  | rhazigine             | 618.8506 |
| 54    |  | strictisidine         | 348.3951 |
| 55    |  | strictamine-N-oxide   | 338.4003 |

| #ID / | Structure                                                                           | Name                                    | FW       |
|-------|-------------------------------------------------------------------------------------|-----------------------------------------|----------|
| 56    | 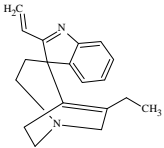   | strictigine                             | 278.3914 |
| 57    |    | strictine                               | 336.3844 |
| 58    |    | stricticine                             | 338.4003 |
| 59    |    | strictalamine                           | 292.3749 |
| 60    |   | 1,2-Dehydroaspidospermidine (eburenine) | 280.4073 |
| 61    |  | Tetrahydrosecodine                      | 342.4751 |
| 62    |  | Dihydrosecodine                         | 340.4592 |
| 63    |  | Dihydrosecamine                         | 678.9026 |
| 64    |  | Dihydropresecamine                      | 678.9026 |
| 65    |  | tetrahydropresecamine                   | 680.9184 |
| 66    |  | rhazinol                                | 294.3908 |

| #ID / | Structure                                                                           | Name                                           | FW       |
|-------|-------------------------------------------------------------------------------------|------------------------------------------------|----------|
| 67    | 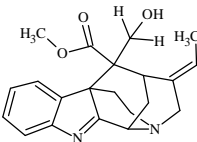   | Rhazimol                                       | 352.4269 |
| 68    |    | Rhazidigenine-N-oxide                          | 314.4219 |
| 69    |    | (-)-16R,21R-omethyleburnamine                  | 310.4332 |
| 70    |    | Decarbomethoxy-15,20,16,17-tetrahydrosecodeine | 284.4390 |
| 71    |    | 1-2-dehydroasidospermidine-N-oxide             | 296.4067 |
| 72    |   | rhazizine                                      | 368.4263 |
| 74    |  | 15-hydroxyvincadifformine                      | 354.4427 |
| 76    |  | Dihydroeburnamenine                            | 280.4073 |
| 77    |  | 16s,16'-decarboxytetra-hydrosecamine           | 622.8824 |
| 78    |  | Nor-C-fluorocurarine                           | 292.3749 |
| 79    |  | strictibine                                    | 213.2319 |

## Supplementary Text S1

### Iteratively varied parameters for AHA assembly

For running the iterative hybrid assembly, these parameters were varied iteratively. Comma separates out the values per iteration.

- Minimum alignment score (aka Z-score) 6,6,6,6
- Minimum number of reads needed to link two contigs. 3,3,2,2
- Minimum subread length to participate in alignment. 75,75,75,75

### Protocol file for PBJelly

<jellyProtocol>

<reference>/scratch/01184/daras/jansen/RHA/pbjelly/RHA\_small\_75per\_overlapping/data/reference/final.assembly.fasta</reference>

<outputDir>/scratch/01184/daras/jansen/RHA/pbjelly/RHA\_small\_75per\_overlapping/</outputDir>

<blasr>-minMatch 8 -minPctIdentity 70 -bestn 8 -nCandidates 30 -maxScore -500 -nproc 8 -noSplitSubreads</blasr>

<input  
baseDir="/scratch/01184/daras/jansen/RHA/pbjelly/RHA\_small\_75per\_overlapping/data/reads/">

<job>Jansen\_Pacbio.cat.fasta</job>

</input>

</jellyProtocol>

### Run parameters for MAKER2

#### Maker\_bopts.ctl

#-----BLAST and Exonerate Statistics Thresholds  
blast\_type=ncbi+ #set to 'ncbi+', 'ncbi' or 'wublast'

pcov\_blastn=0.8 #Blastn Percent Coverage Threshold EST-Genome Alignments

pid\_blastn=0.85 #Blastn Percent Identity Threshold EST-Genome Alignments

eval\_blastn=1e-10 #Blastn eval cutoff

bit\_blastn=40 #Blastn bit cutoff

depth\_blastn=0 #Blastn depth cutoff (0 to disable cutoff)

pcov\_blastx=0.5 #Blastx Percent Coverage Threshold Protein-Genome Alignments

pid\_blastx=0.4 #Blastx Percent Identity Threshold Protein-Genome Alignments

eval\_blastx=1e-06 #Blastx eval cutoff  
bit\_blastx=30 #Blastx bit cutoff  
depth\_blastx=0 #Blastx depth cutoff (0 to disable cutoff)

pcov\_tblastx=0.8 #tBlastx Percent Coverage Threshold alt-EST-Genome Alignments  
pid\_tblastx=0.85 #tBlastx Percent Identity Threshold alt-EST-Genome Alignments  
eval\_tblastx=1e-10 #tBlastx eval cutoff  
bit\_tblastx=40 #tBlastx bit cutoff  
depth\_tblastx=0 #tBlastx depth cutoff (0 to disable cutoff)

pcov\_rm\_blastx=0.5 #Blastx Percent Coverage Threshold For Transposable Element Masking  
pid\_rm\_blastx=0.4 #Blastx Percent Identity Threshold For Transposable Element Masking  
eval\_rm\_blastx=1e-06 #Blastx eval cutoff for transposable element masking  
bit\_rm\_blastx=30 #Blastx bit cutoff for transposable element masking

ep\_score\_limit=20 #Exonerate protein percent of maximal score threshold  
en\_score\_limit=20 #Exonerate nucleotide percent of maximal score threshold

### **Maker\_exe.ctl**

#-----Location of Executables Used by MAKER/EVALUATOR  
makeblastdb=/scratch/projects/tacc/bio/maker/2.28b/blast/bin/makeblastdb  
#location of NCBI+ makeblastdb executable  
blastn=/scratch/projects/tacc/bio/maker/2.28b/blast/bin/blastn #location of  
NCBI+ blastn executable  
blastx=/scratch/projects/tacc/bio/maker/2.28b/blast/bin/blastx #location of  
NCBI+ blastx executable  
tblastx=/scratch/projects/tacc/bio/maker/2.28b/blast/bin/tblastx #location of  
NCBI+ tblastx executable  
formatdb= #location of NCBI formatdb executable  
blastall= #location of NCBI blastall executable  
xdformat= #location of WUBLAST xdformat executable  
blasta= #location of WUBLAST blasta executable  
RepeatMasker=/scratch/projects/tacc/bio/maker/2.28b/RepeatMasker/RepeatMa  
sker #location of RepeatMasker executable  
exonerate=/scratch/projects/tacc/bio/maker/2.28b/exonerate/bin/exonerate  
#location of exonerate executable

#-----Ab-initio Gene Prediction Algorithms  
snap=/scratch/projects/tacc/bio/maker/2.28b/snap/snap #location of snap  
executable  
gmhmm3= #location of eukaryotic genemark executable  
gmhmp= #location of prokaryotic genemark executable



augustus=/scratch/projects/tacc/bio/maker/2.28b/augustus/bin/augustus  
#location of augustus executable  
fgenesh= #location of fgenesh executable

#-----Other Algorithms

probuild= #location of probuild executable (required for genemark)

## **Maker\_opts.ctl**

#-----Genome (these are always required)

genome=opgenResult+scaffoldsLengthsLess200.fasta #genome sequence (fasta file or fasta embeded in GFF3 file)

organism\_type=eukaryotic #eukaryotic or prokaryotic. Default is eukaryotic

#-----Re-annotation Using MAKER Derived GFF3

maker\_gff= #MAKER derived GFF3 file

est\_pass=0 #use ESTs in maker\_gff: 1 = yes, 0 = no

altest\_pass=0 #use alternate organism ESTs in maker\_gff: 1 = yes, 0 = no

protein\_pass=0 #use protein alignments in maker\_gff: 1 = yes, 0 = no

rm\_pass=0 #use repeats in maker\_gff: 1 = yes, 0 = no

model\_pass=0 #use gene models in maker\_gff: 1 = yes, 0 = no

pred\_pass=0 #use ab-initio predictions in maker\_gff: 1 = yes, 0 = no

other\_pass=0 #passthrough anything else in maker\_gff: 1 = yes, 0 = no

#-----EST Evidence (for best results provide a file for at least one)

est=trinityOut.Trinity.fasta #set of ESTs or assembled mRNA-seq in fasta format

altest= #EST/cDNA sequence file in fasta format from an alternate organism

est\_gff= #aligned ESTs or mRNA-seq from an external GFF3 file

altest\_gff= #aligned ESTs from a closely related species in GFF3 format

#-----Protein Homology Evidence (for best results provide a file for at least one)

protein=uniprot\_sprot.fasta #protein sequence file in fasta format (i.e. from multiple organisms)

protein\_gff= #aligned protein homology evidence from an external GFF3 file

#-----Repeat Masking (leave values blank to skip repeat masking)

model\_org=all #select a model organism for RepBase masking in RepeatMasker

rmlib= #provide an organism specific repeat library in fasta format for RepeatMasker

repeat\_protein=/opt/apps/maker/2.30/data/te\_proteins.fasta #provide a fasta file of transposable element proteins for RepeatRunner

rm\_gff= #pre-identified repeat elements from an external GFF3 file

prok\_rm=0 #forces MAKER to repeatmask prokaryotes (no reason to change this), 1 = yes, 0 = no

softmask=1 #use soft-masking rather than hard-masking in BLAST (i.e. seg and dust filtering)

#----Gene Prediction

snaphmm=RHA.hmm #SNAP HMM file

gmhmm= #GeneMark HMM file

augustus\_species= #Augustus gene prediction species model

fgenes\_par\_file= #FGENESH parameter file

pred\_gff= #ab-initio predictions from an external GFF3 file

model\_gff= #annotated gene models from an external GFF3 file (annotation pass-through)

est2genome=0 #infer gene predictions directly from ESTs, 1 = yes, 0 = no

protein2genome=1 #infer predictions from protein homology, 1 = yes, 0 = no

unmask=0 #also run ab-initio prediction programs on unmasked sequence, 1 = yes, 0 = no

#----Other Annotation Feature Types (features MAKER doesn't recognize)

other\_gff= #extra features to pass-through to final MAKER generated GFF3 file

#----External Application Behavior Options

alt\_peptide=C #amino acid used to replace non-standard amino acids in BLAST databases

cpus=24 #max number of cpus to use in BLAST and RepeatMasker (not for MPI, leave 1 when using MPI)

#----MAKER Behavior Options

max\_dna\_len=100000 #length for dividing up contigs into chunks (increases/decreases memory usage)

min\_contig=1 #skip genome contigs below this length (under 10kb are often useless)

pred\_flank=200 #flank for extending evidence clusters sent to gene predictors

pred\_stats=0 #report AED and QI statistics for all predictions as well as models

AED\_threshold=1 #Maximum Annotation Edit Distance allowed (bound by 0 and 1)

min\_protein=0 #require at least this many amino acids in predicted proteins

alt\_splice=0 #Take extra steps to try and find alternative splicing, 1 = yes, 0 = no

always\_complete=0 #extra steps to force start and stop codons, 1 = yes, 0 = no

map\_forward=0 #map names and attributes forward from old GFF3 genes, 1 = yes, 0 = no

keep\_preds=0 #Concordance threshold to add unsupported gene prediction (bound by 0 and 1)

split\_hit=10000 #length for the splitting of hits (expected max intron size for evidence alignments)

single\_exon=0 #consider single exon EST evidence when generating annotations, 1 = yes, 0 = no

single\_length=250 #min length required for single exon ESTs if 'single\_exon is enabled'  
correct\_est\_fusion=0 #limits use of ESTs in annotation to avoid fusion genes

tries=2 #number of times to try a contig if there is a failure for some reason  
clean\_try=0 #remove all data from previous run before retrying, 1 = yes, 0 = no  
clean\_up=0 #removes theVoid directory with individual analysis files, 1 = yes, 0 = no  
TMP= #specify a directory other than the system default temporary directory for temporary files

**Supplementary Figure S1: Divergent structural evolution in *Rhazya stricta*.** Genome level rearrangements leading from the ancestral core eudicot, represented by *Vitis* (upper right hand corner) to *Rhazya* and *Coffea*. Each linear arrangement represents successive steps from the eudicot ancestor toward the Gentianales ancestor. An arrow leads from the last of these stages to the relevant portion of the Gentianales ancestor. From this ancestor, two arrows indicate the divergence of *Coffea* and *Rhazya*, and successive rearrangements within each lineage are again indicated by linear arrangements of colored blocks. Inferred rearrangements between lineages are given at the arrows. Extant genomes carry the species name. The circular diagrams at the lower left and right represent the current orthologies between *Rhazya* and *Coffea* and *Vitis*, respectively. Syntenic blocks are colored according to the 21 ancestral core eudicot chromosomes<sup>33</sup> and do not represent biologically significant units. a) inferred orthologies for *Rhazya* superscaffolds 7, 9 and 10; b) superscaffolds 12, 13 and 28.

**Supplementary Figure S2: Maximum likelihood phylogenies for 21 monoterpenoid indole alkaloid (MIA) sequences.** Sequences of experimentally verified genes from GenBank for *Catharanthus* and *Rauvolfia* are indicated with a red arrow and accession numbers for these sequences are in Supplementary Table S7. Cra, *C. roseus*; Cc, *Coffea canephora*; rha, *Rhazya stricta*; rsa, *R. serpentina*; tom, *Solanum lycopersicum*; thec, *Theobroma cacao*. Full names for protein abbreviations in upper left corner of each tree are in Supplementary Table S7.

**Supplementary Figure S3: Duplication and loss of selected monoterpenoid indole alkaloid (MIA) enzymes across six angiosperms.** Gene phylogenies were reconciled

with the species phylogeny to infer duplication and loss history for each enzyme family. Internal and terminal branches in black reflect the amount of change along branch; dashed gray branch extensions are present for branches whose lengths were too short to enable uniform representation with branch support and length information. *cra*, *Catharanthus roseus*; *cof*, *Coffea canephora*; *rha*, *Rhazya stricta*; *rsa*, *Rauvolfia serpentina*; *tom*, *Solanum lycopersicum*; *the*, *Theobroma cacao*. Species indicated in blue font were downloaded from GenBank and those in red are from *Rhazya stricta*. Red square = gene duplication; green circle = speciation event; wide gray dashed line ending with a circle = gene loss. Full names for protein abbreviations in upper left corner of each tree are in Supplementary Table S7. Values above branches indicate bootstrap support for the clade, numbers below nodes give bootstrap support for the event (duplication or speciation) at the node. Bootstrap values less than 50 are not shown; inferred loss events are indicated with an asterisk and do not have associated bootstrap values. Scale bar represents number of amino acid substitutions per site. The maximum likelihood (ML) tree shown is the tree with the best ML score.

**a.***Coffea canephora*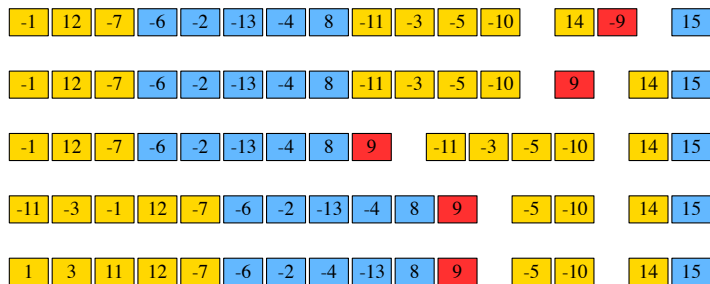*Vitis vinifera (post γ eudicot)*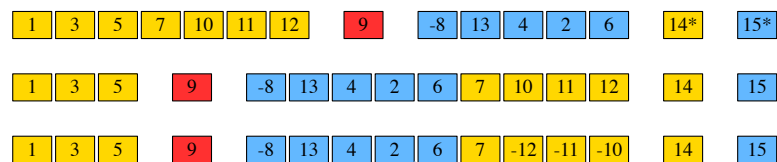

four translocations  
one inversion  
one transposition

## Gentianales ancestor

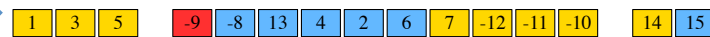

three translocations  
one inversion  
one transposition

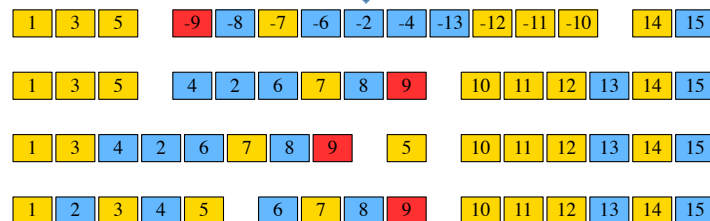*Rhazya stricta*

one translocation  
one inversion  
two fusions

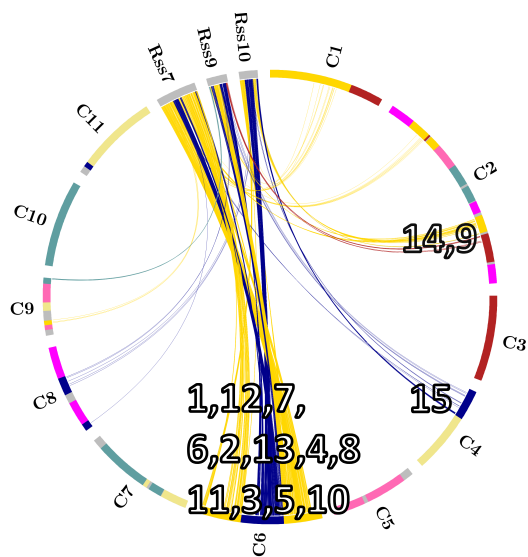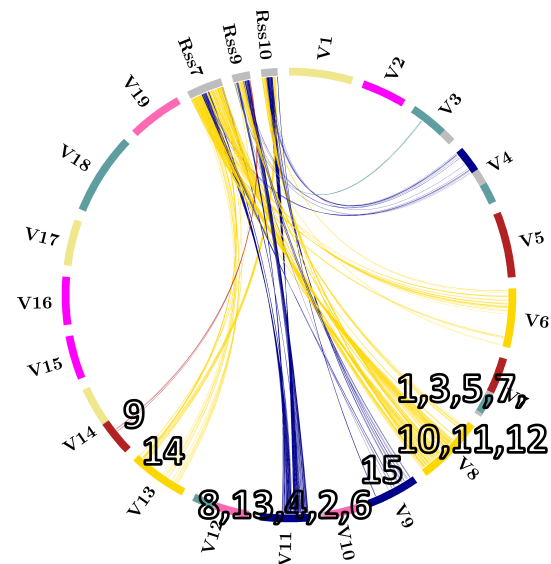

**b.***Vitis vinifera* (post  $\gamma$  eudicot)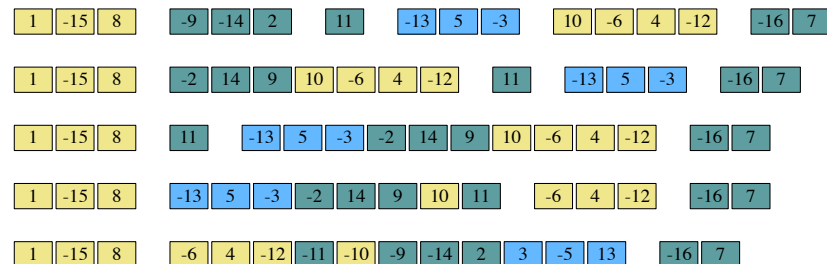*Coffea canephora*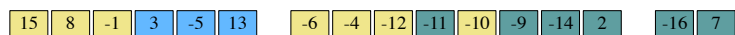

one translocation  
one inversion

Gentianales ancestor

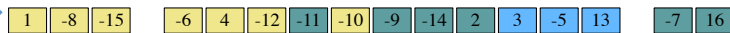

six translocations  
one inversion

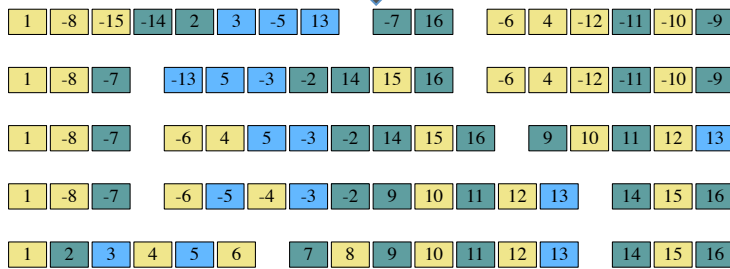*Rhazya stricta*

one translocation  
one inversion  
three fusions  
one transposition

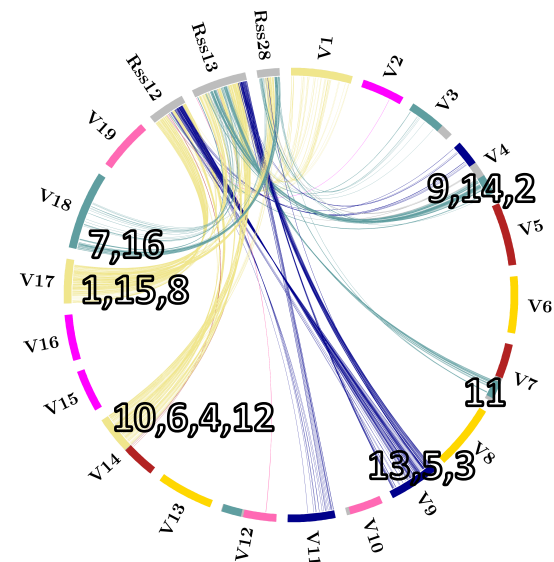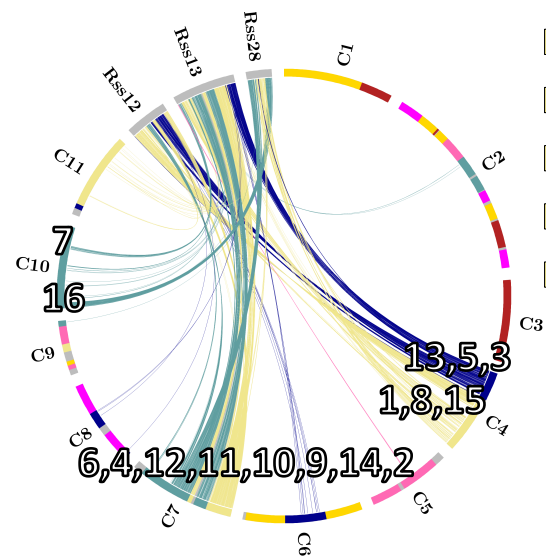

# a. 7DLS

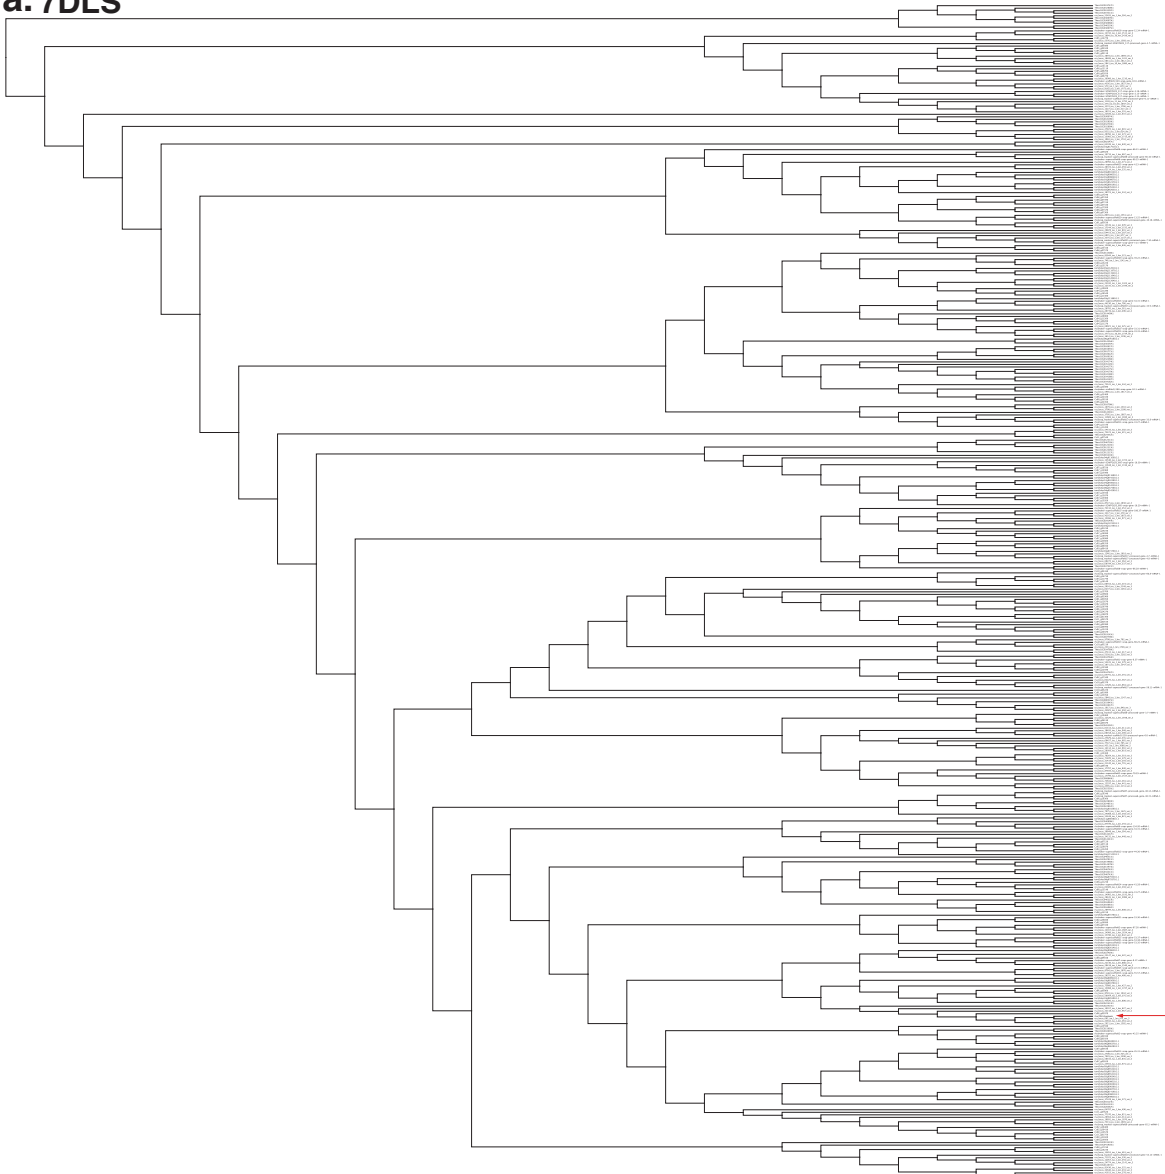



# b. 160MT

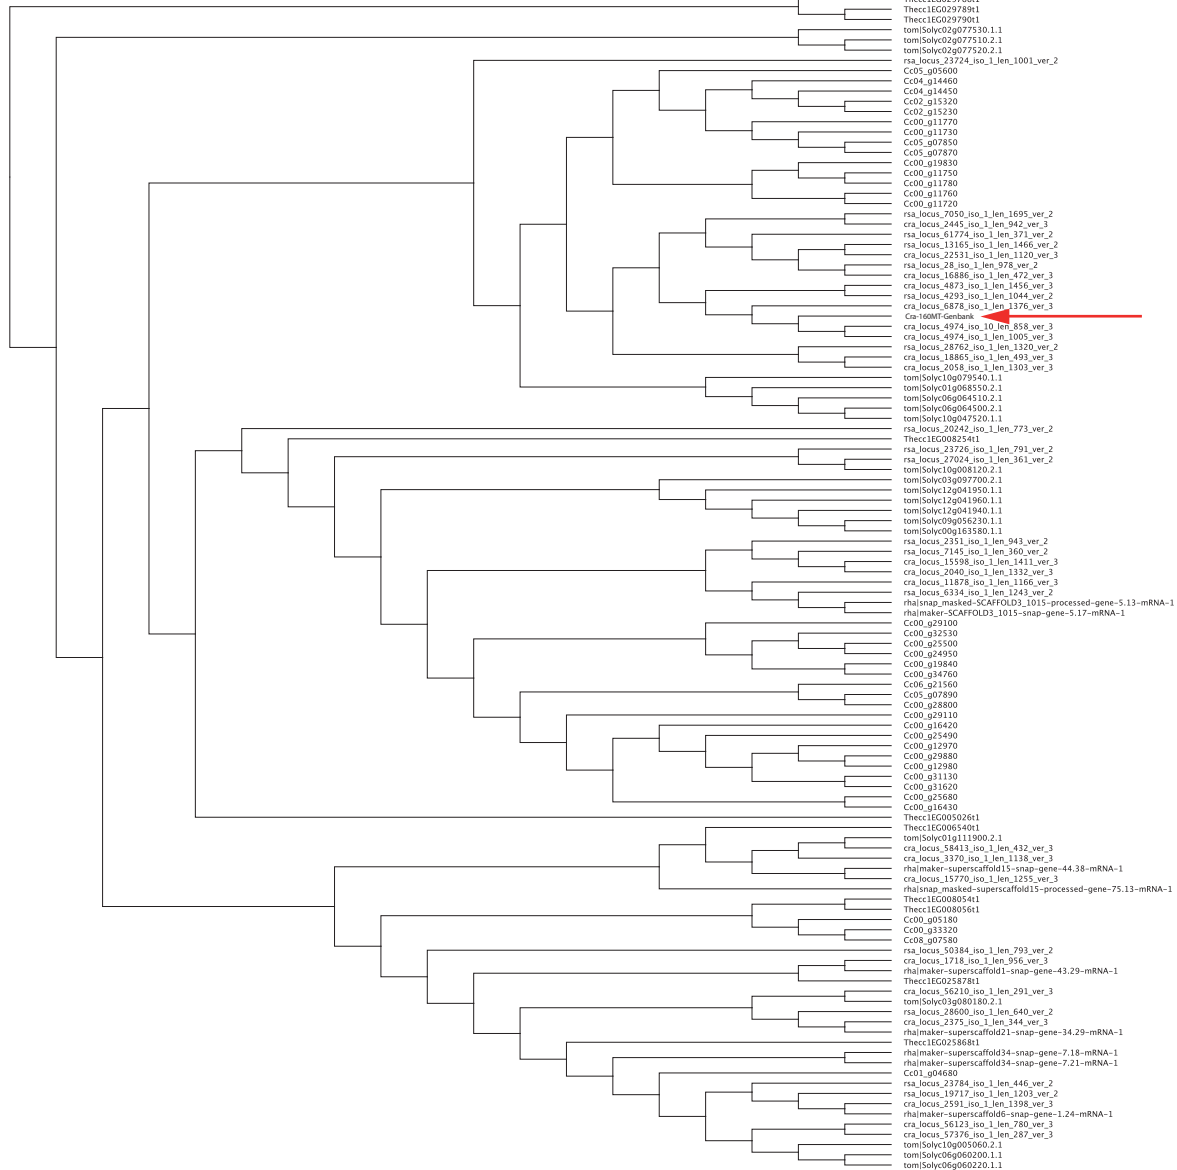

# C. AAE

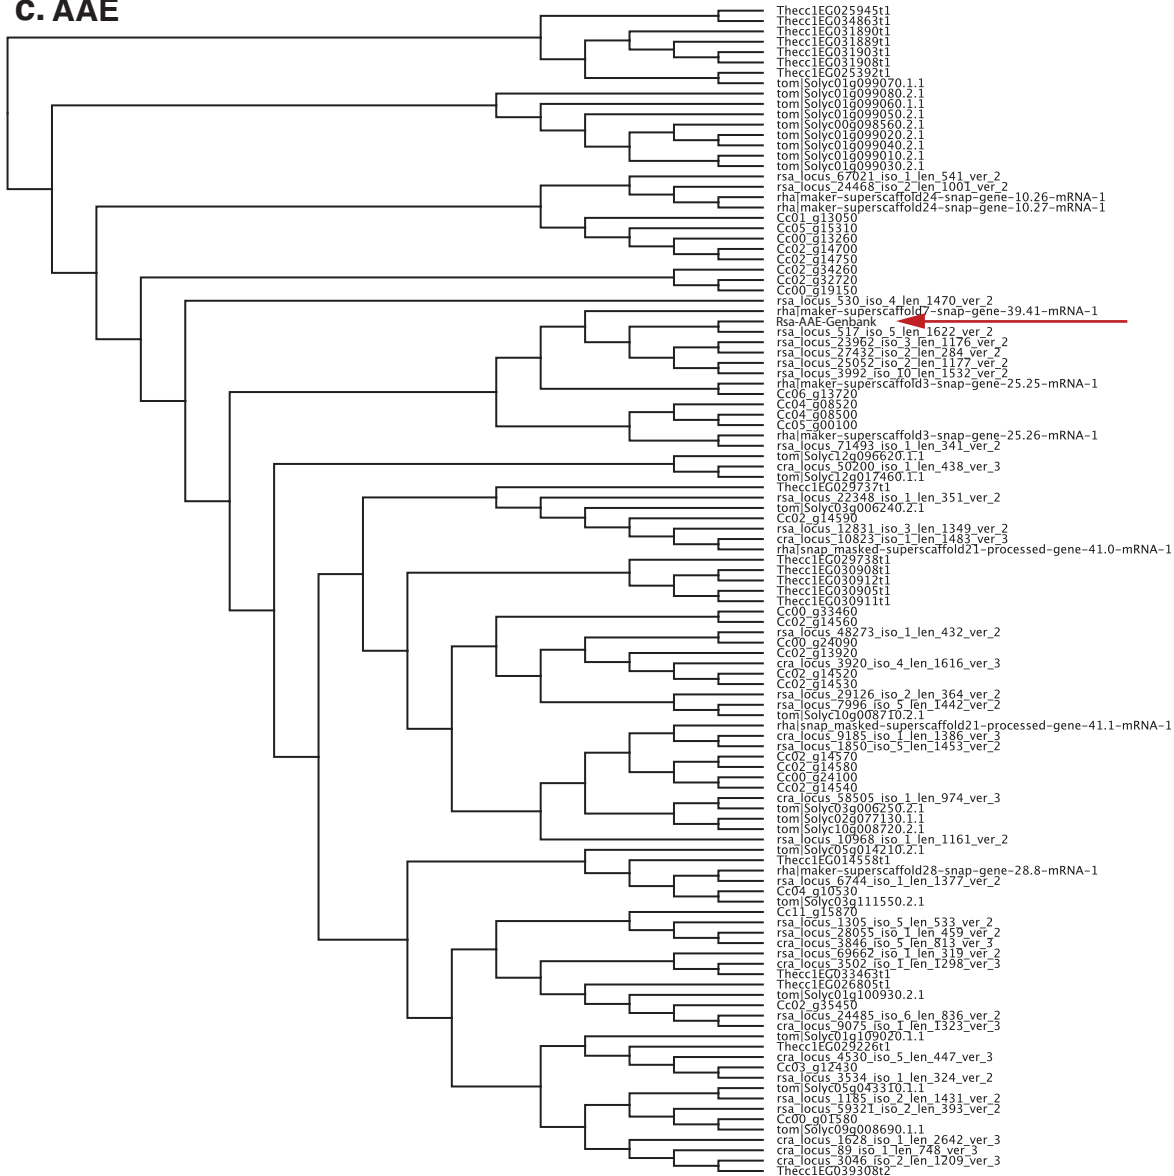

# d. DAT

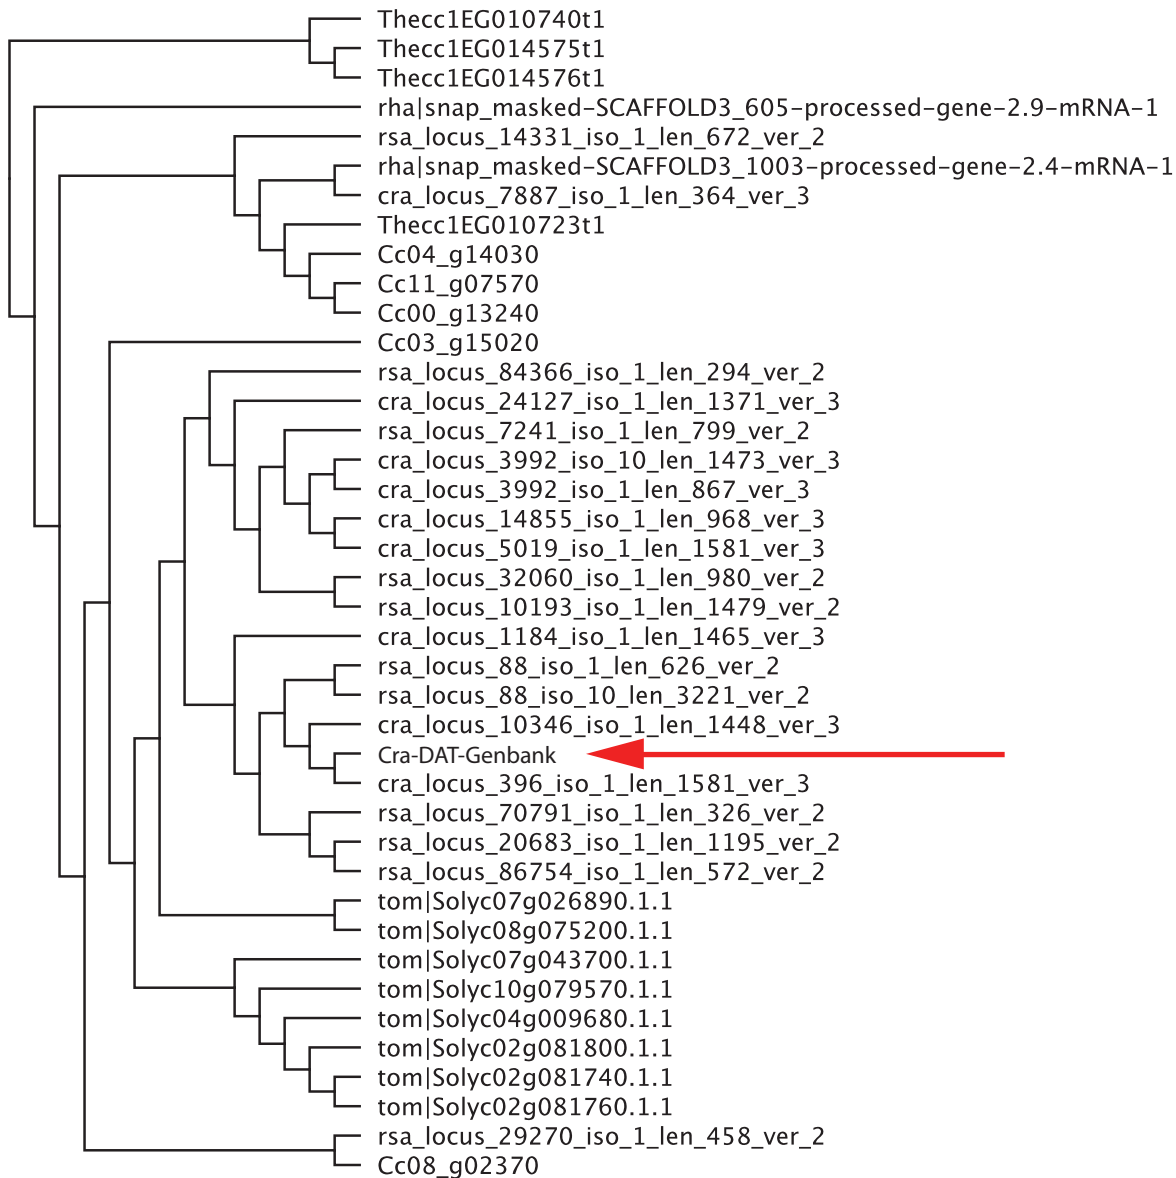

e. D4H

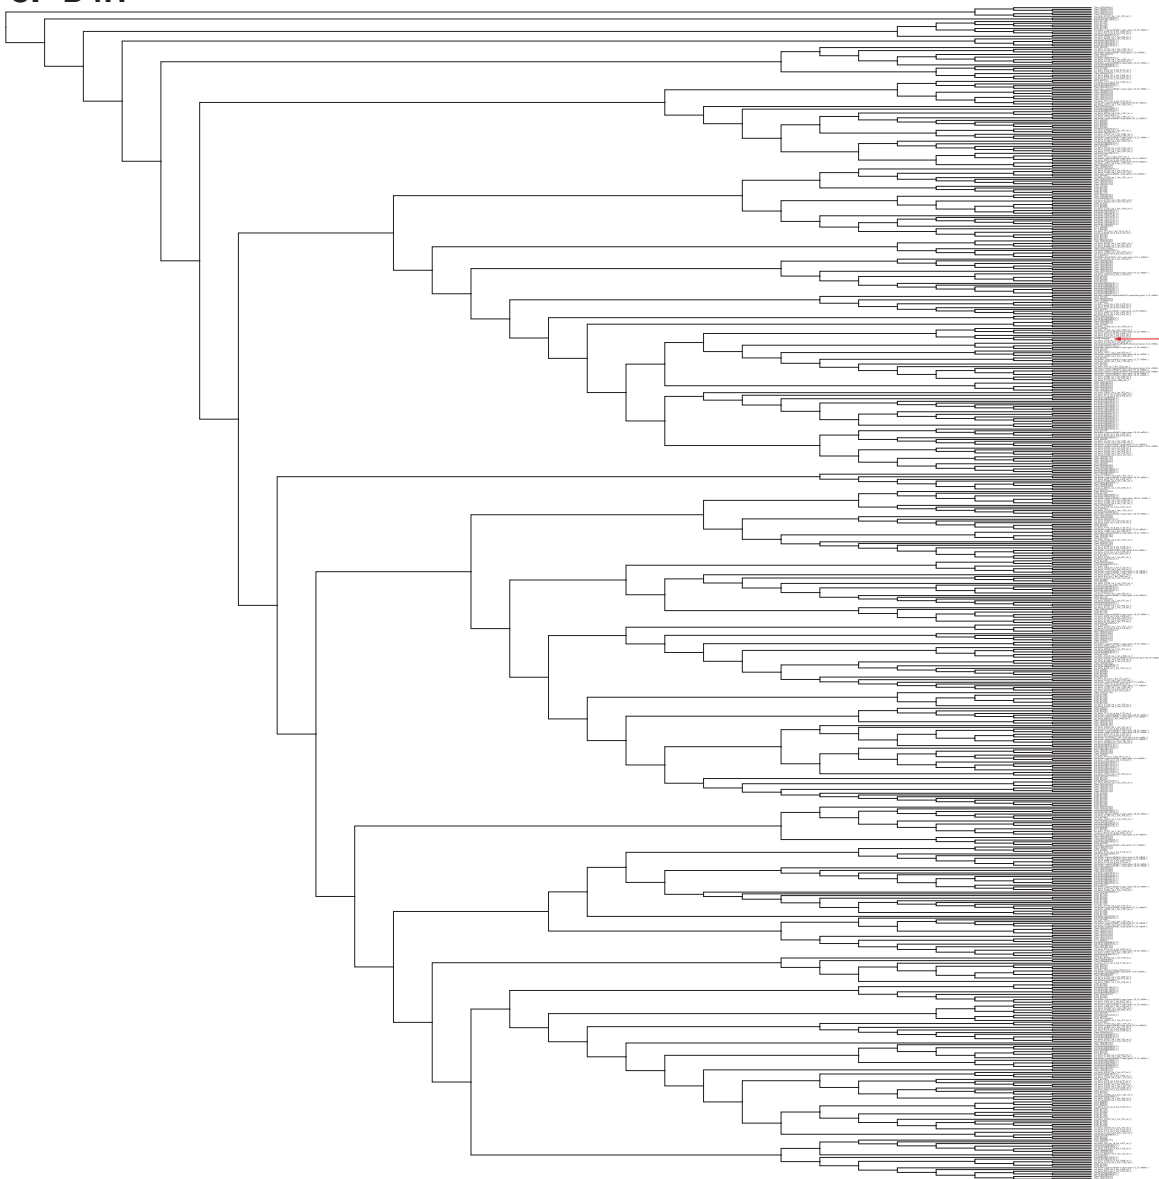

# f. G10H

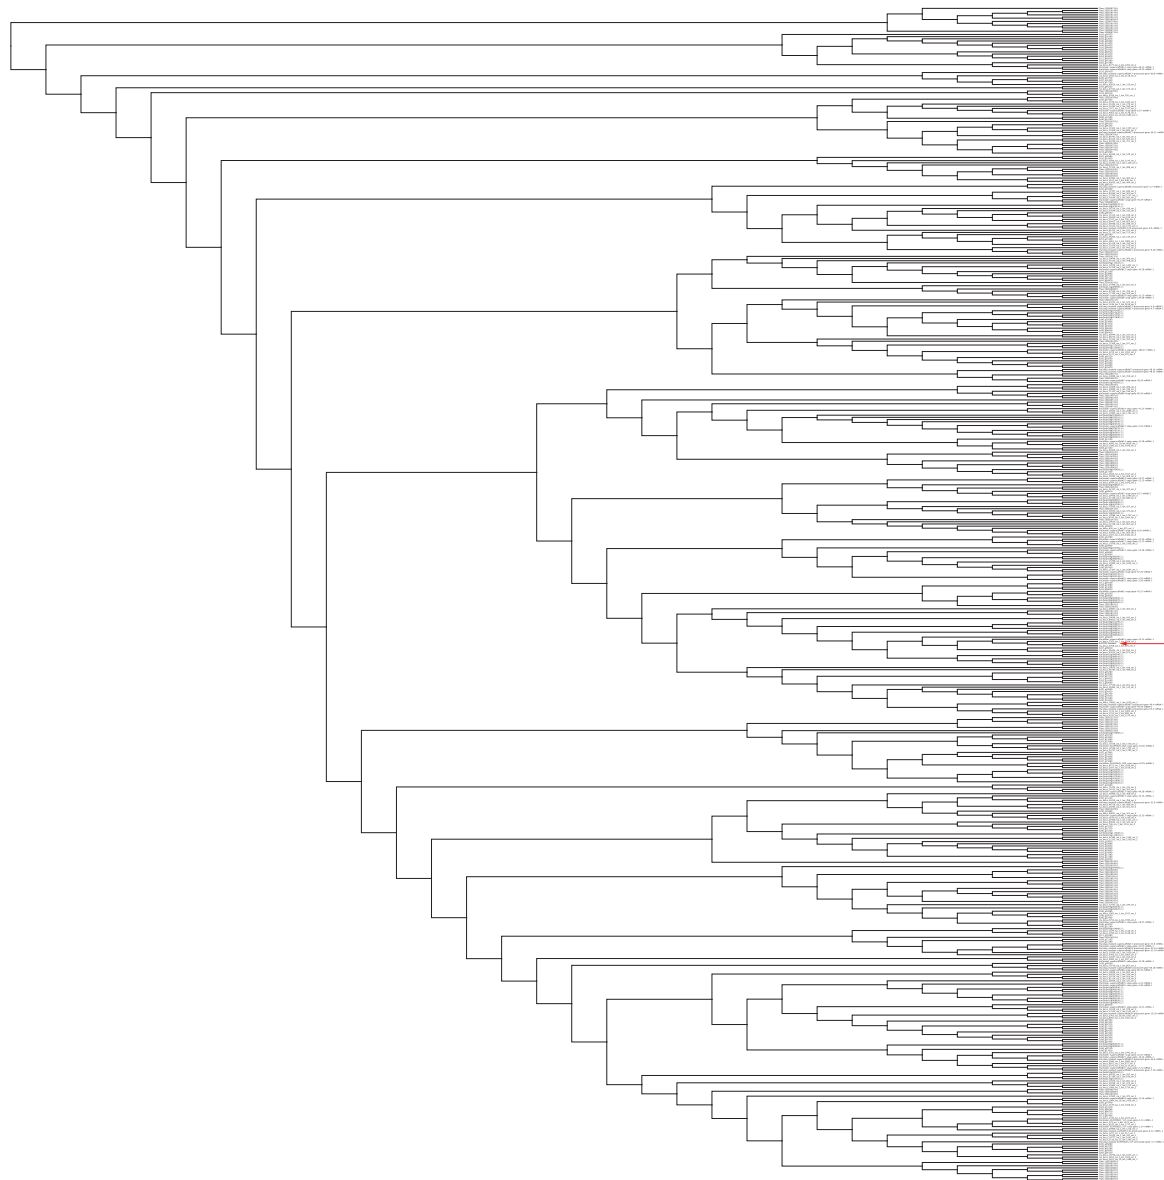

# g. LAMT

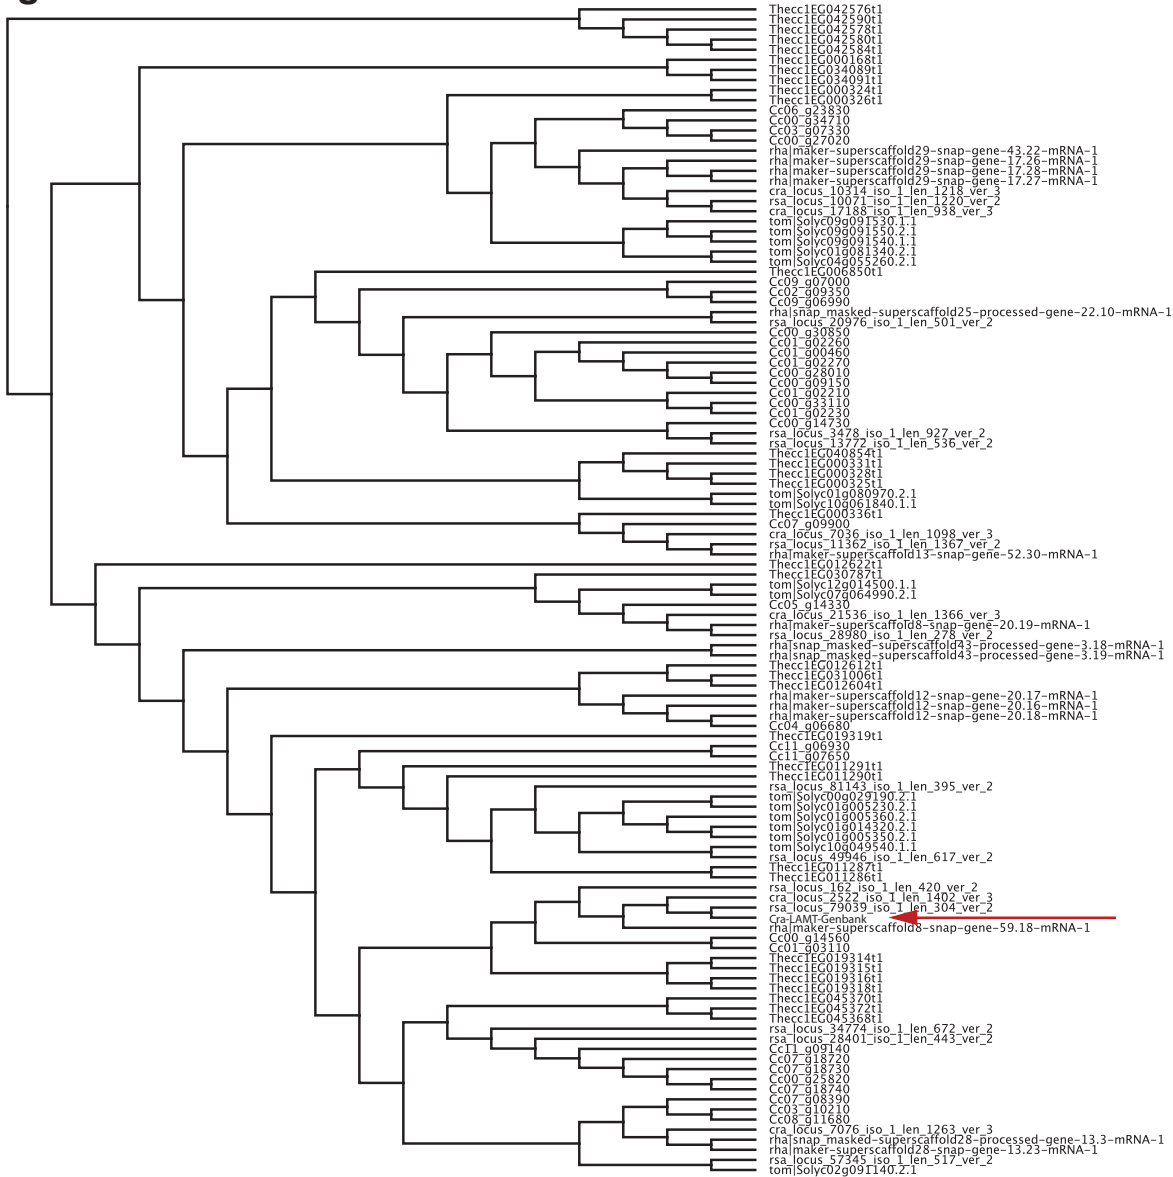

## h. MAT

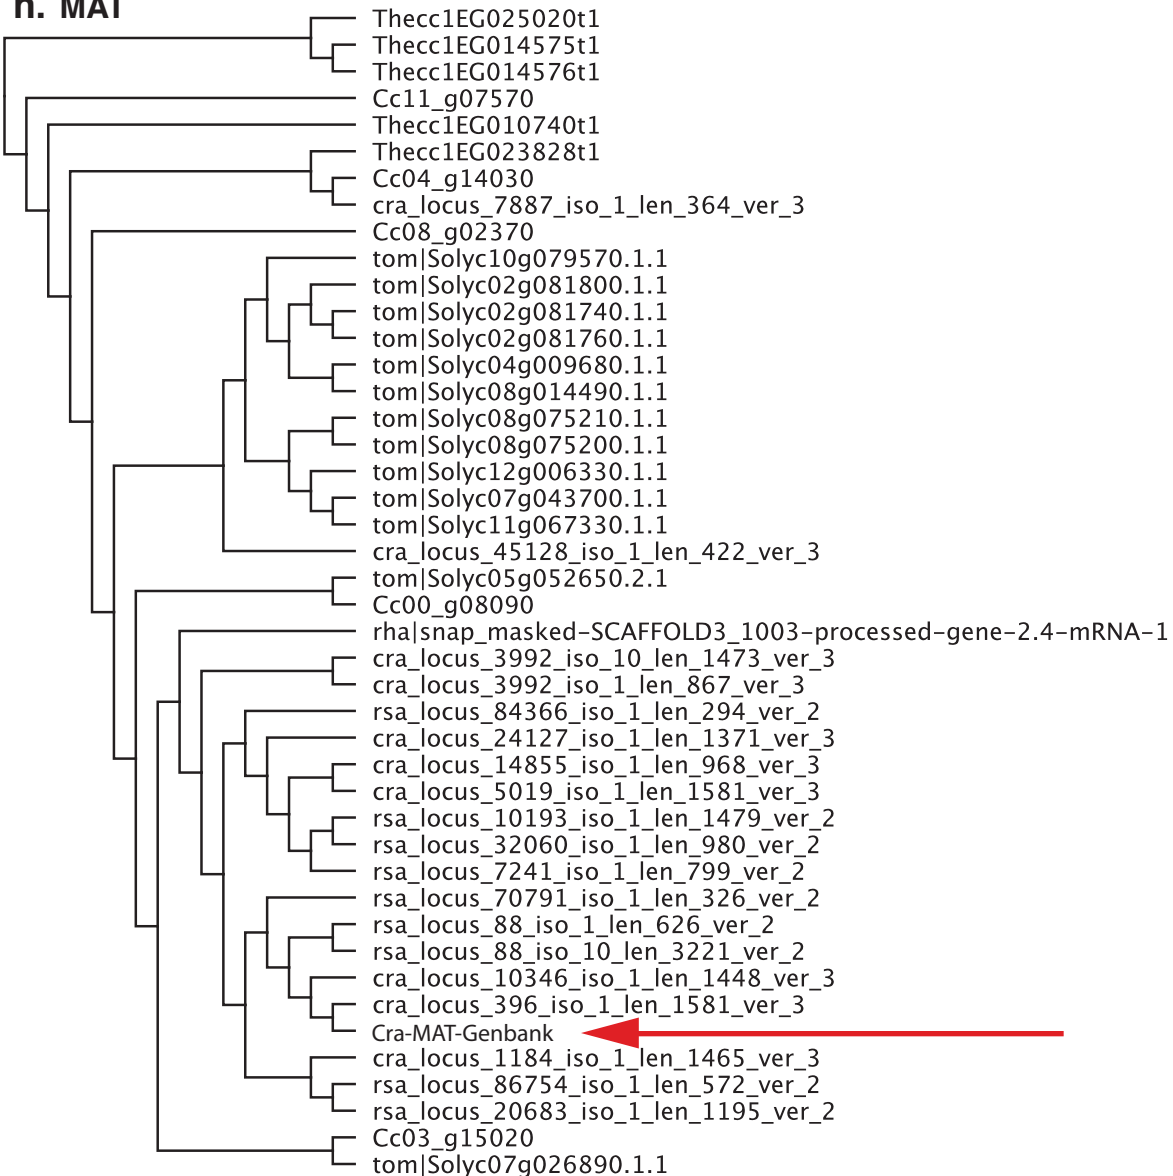

# i. NMT

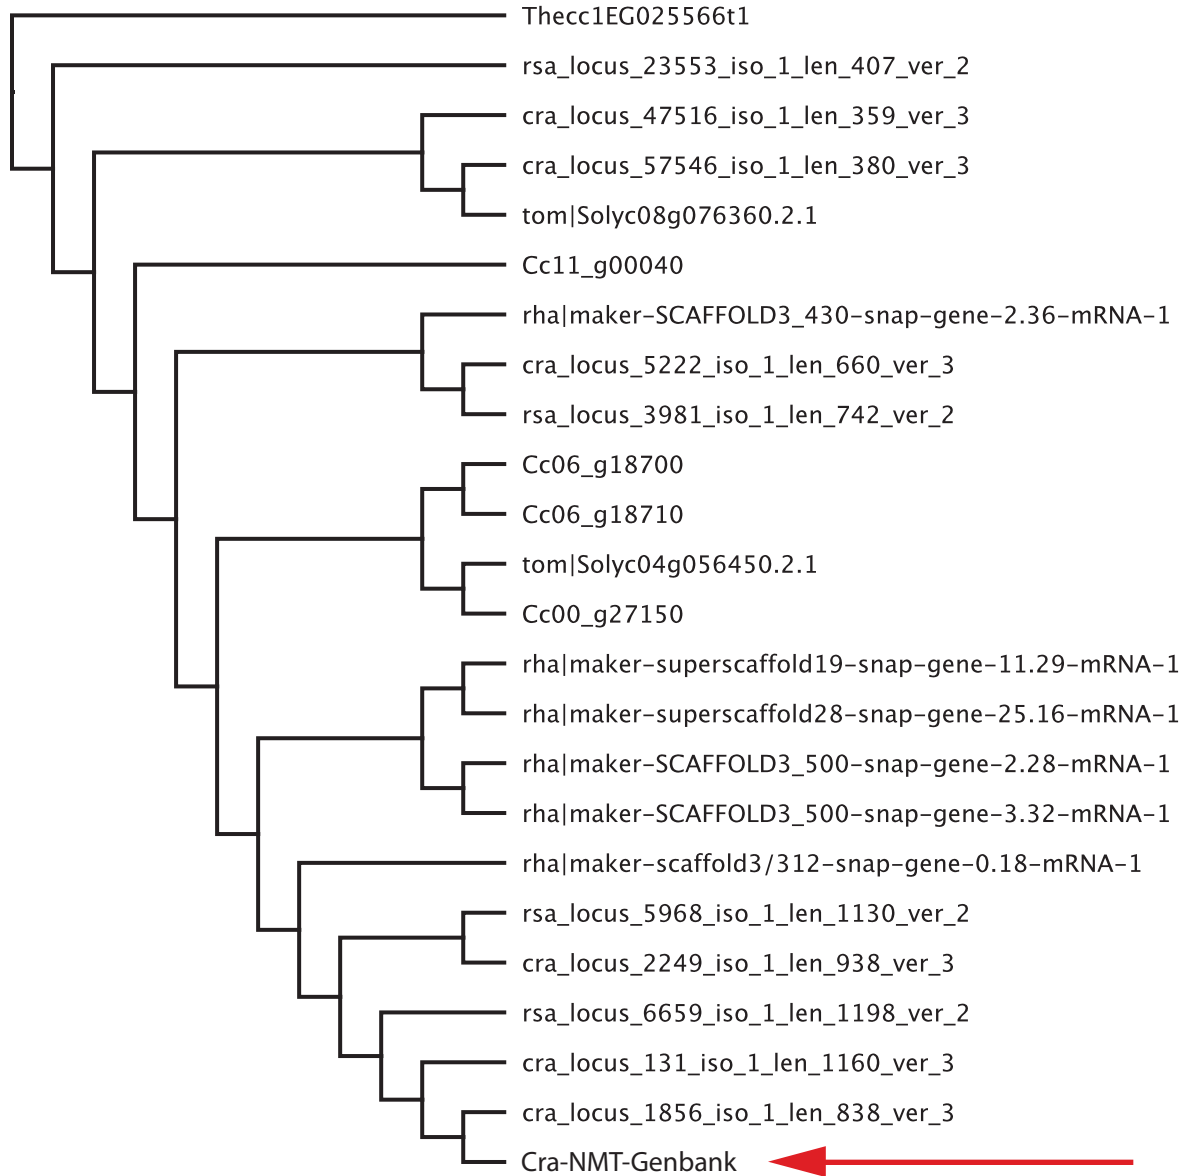



# J. PNAE

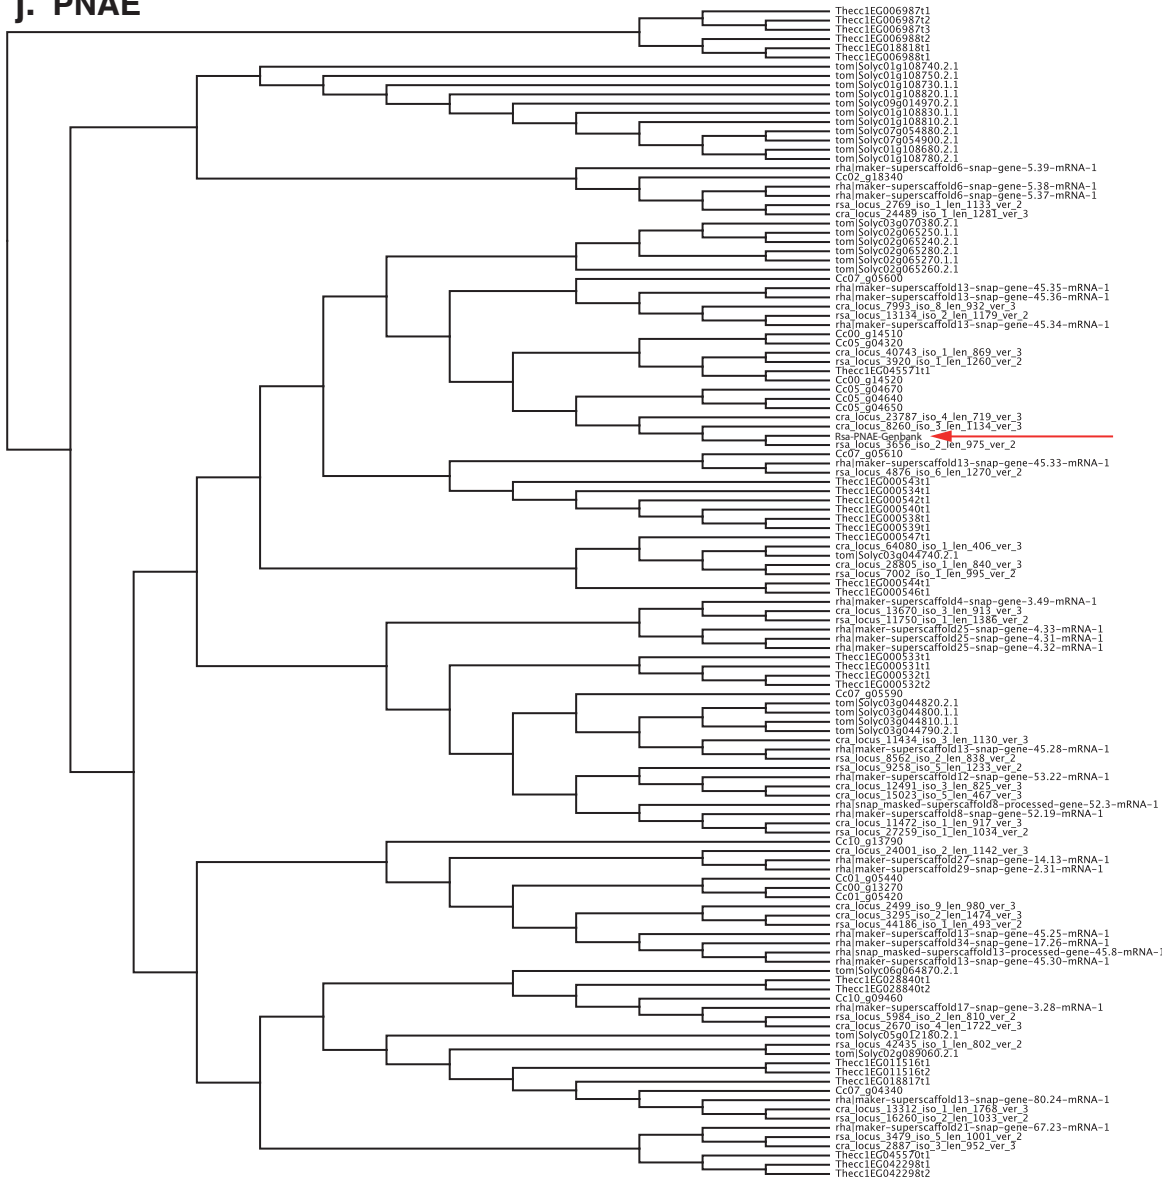

# K. PR

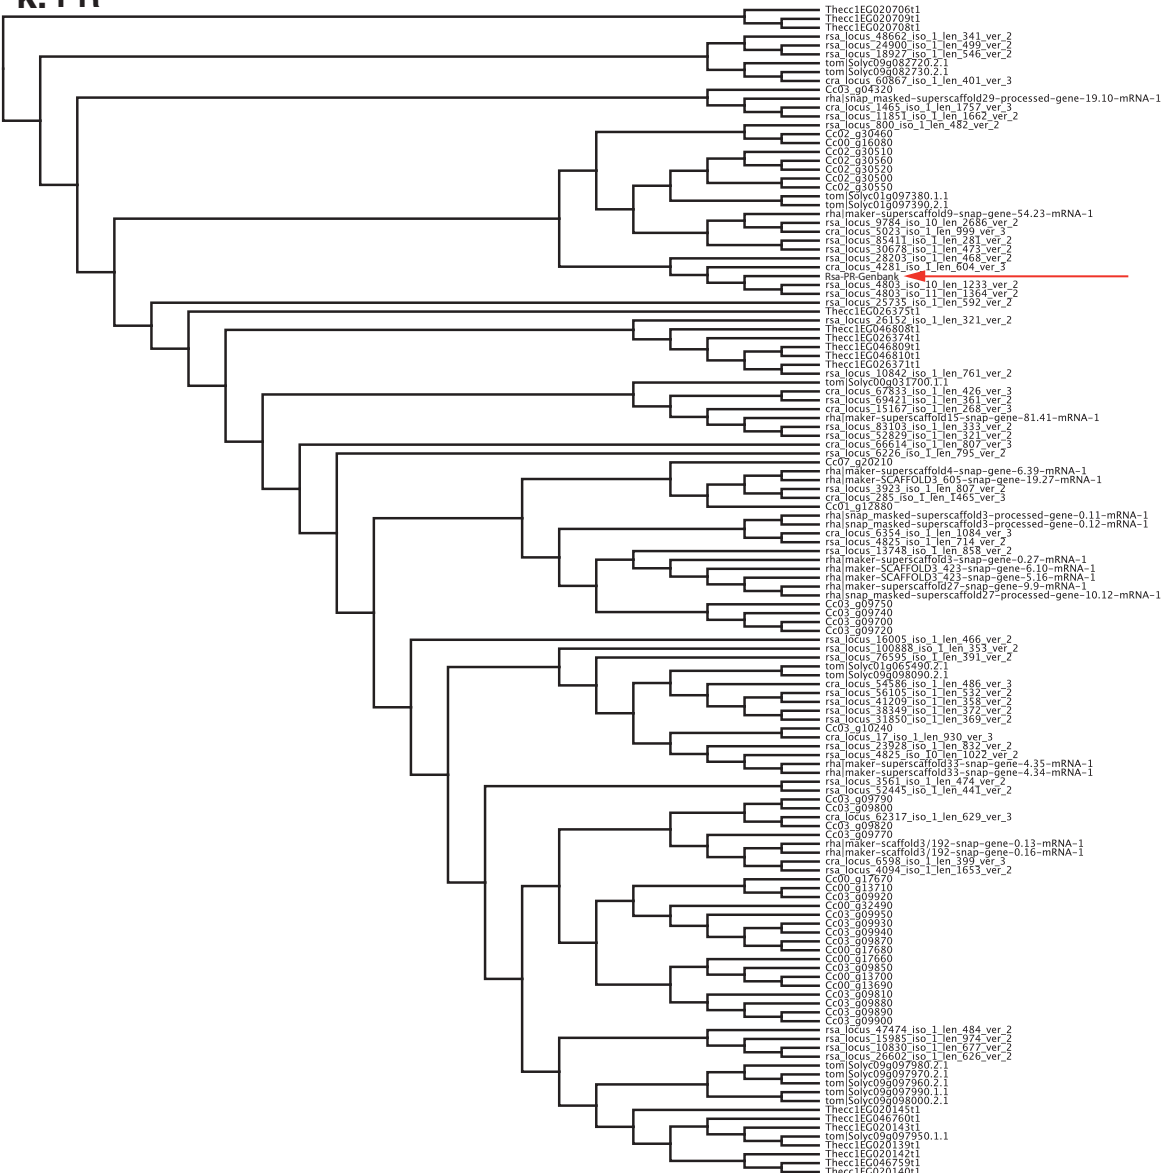

# I. PRX1

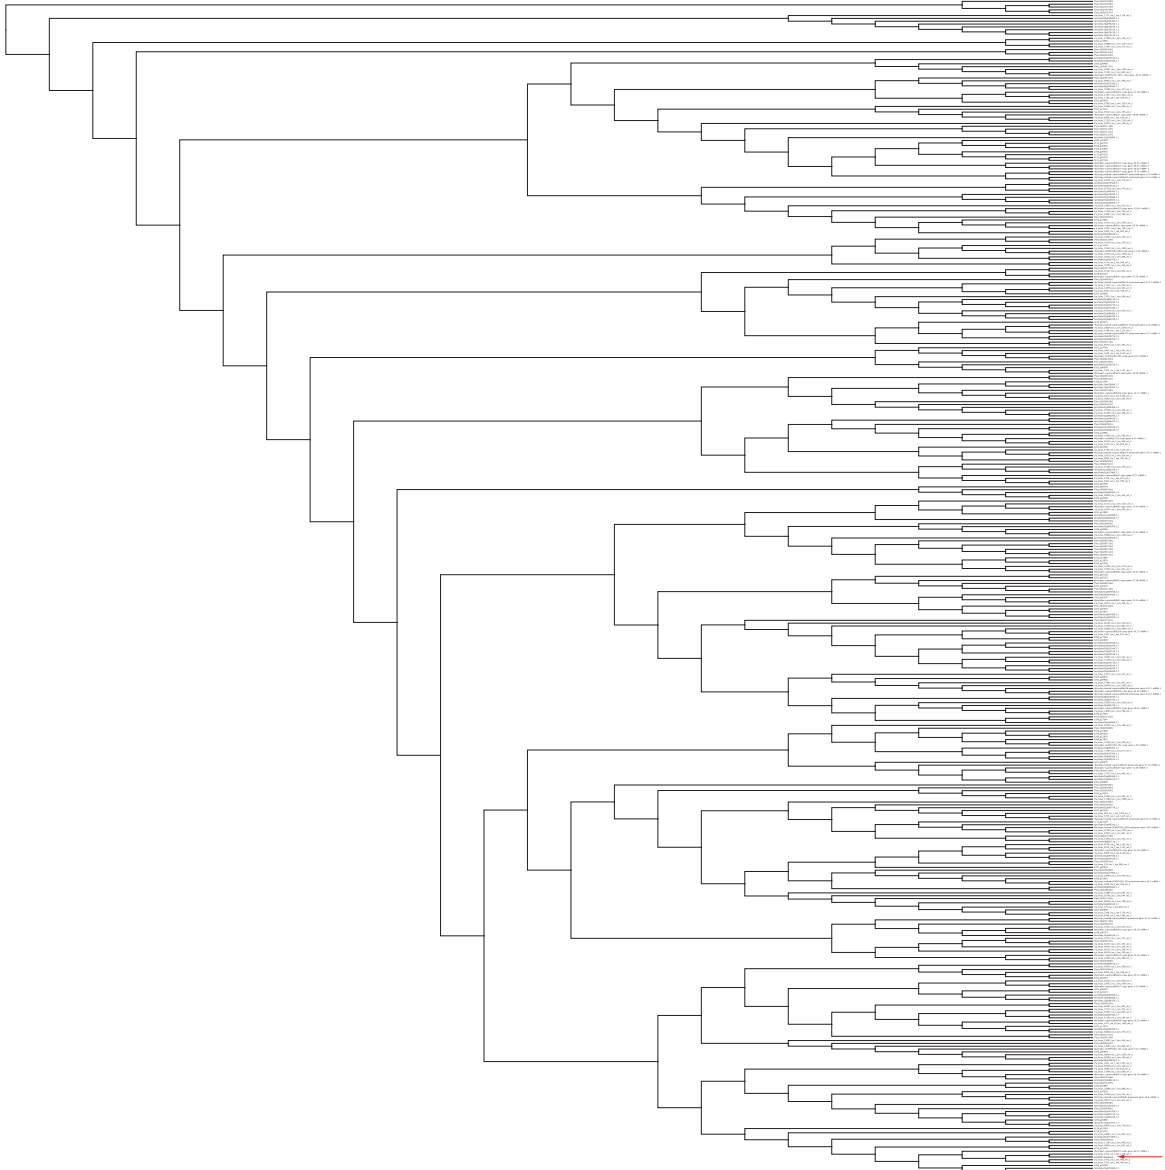



# n. SGD

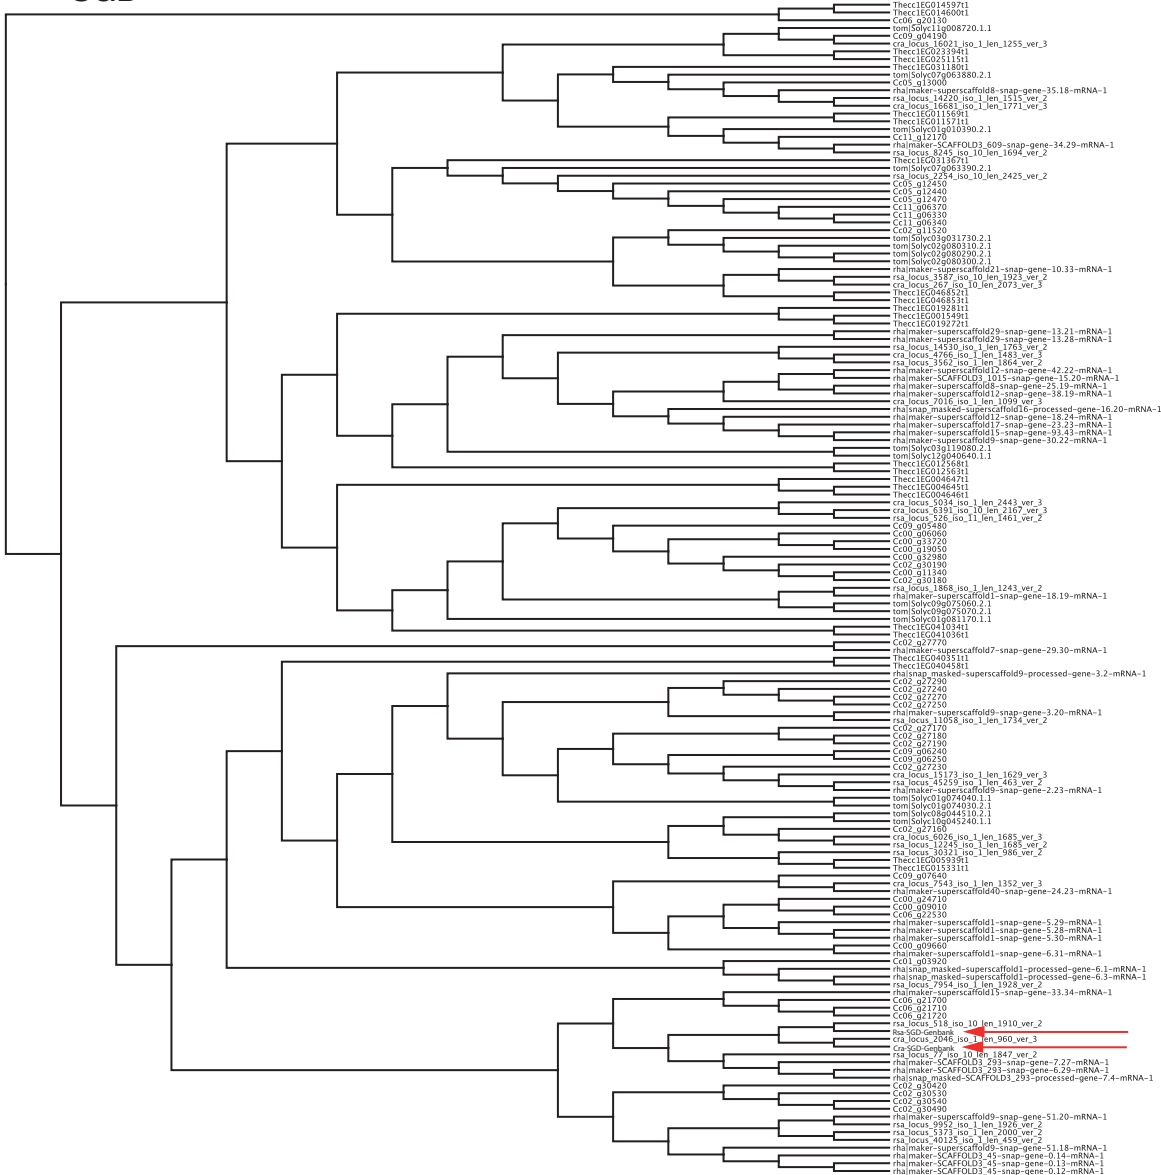

# O. SLS

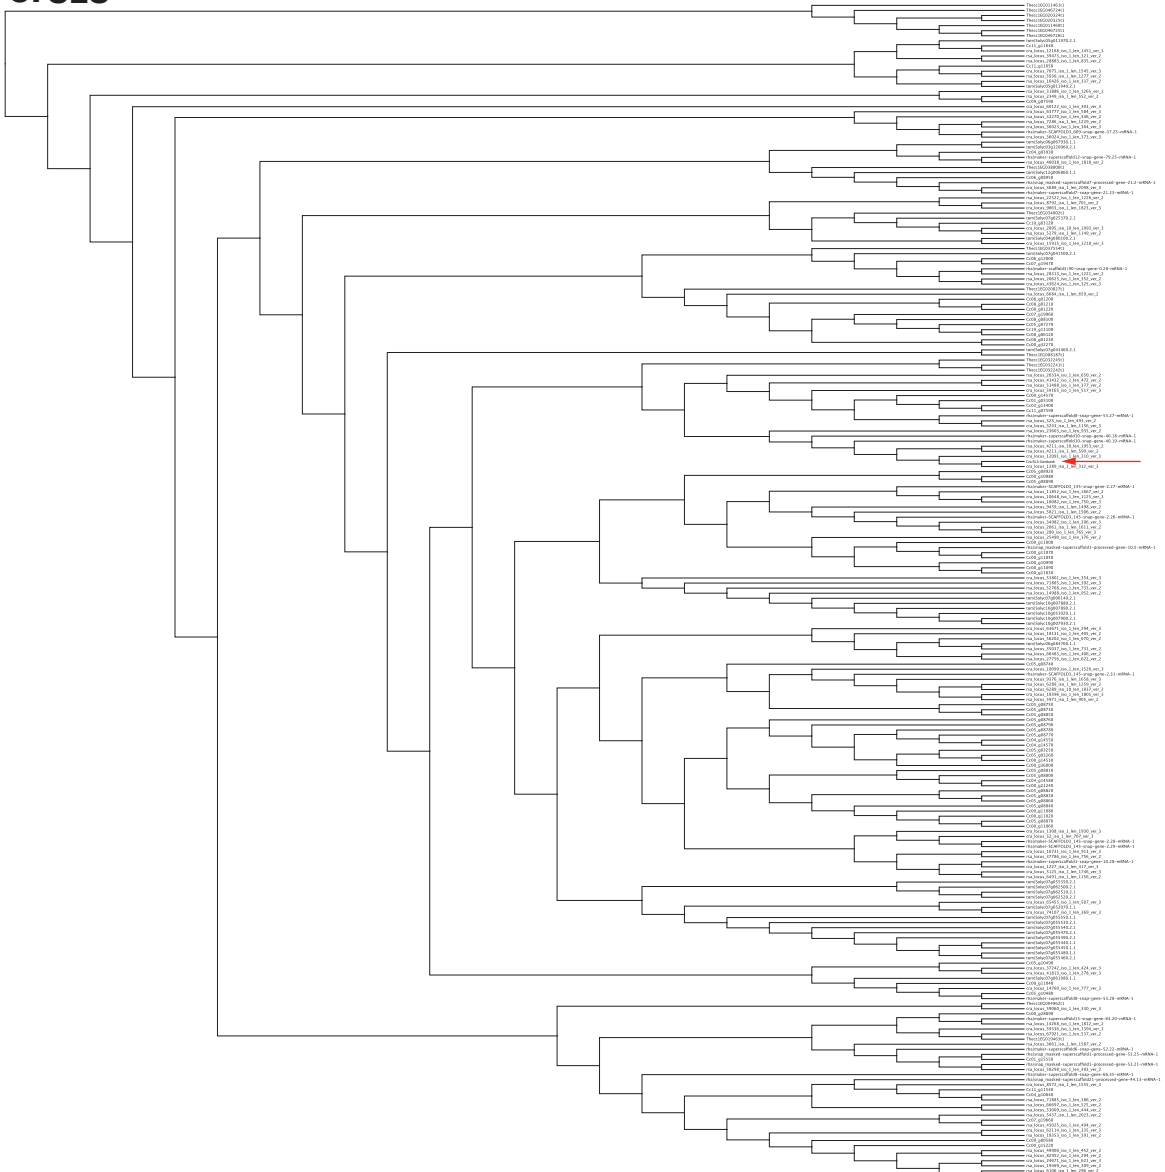

# p. STR

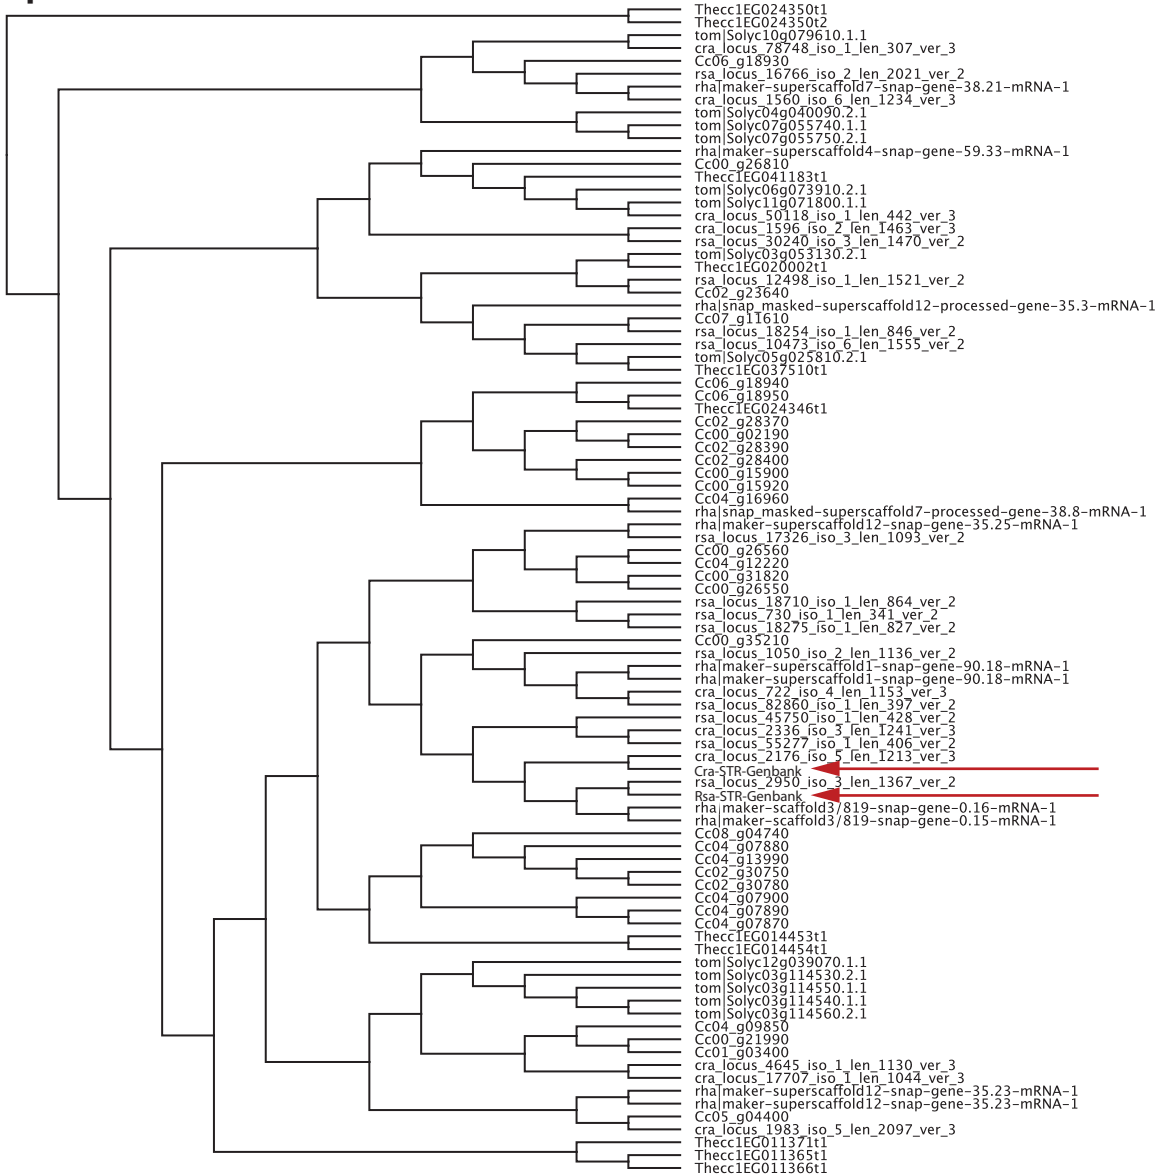

# q. T16H

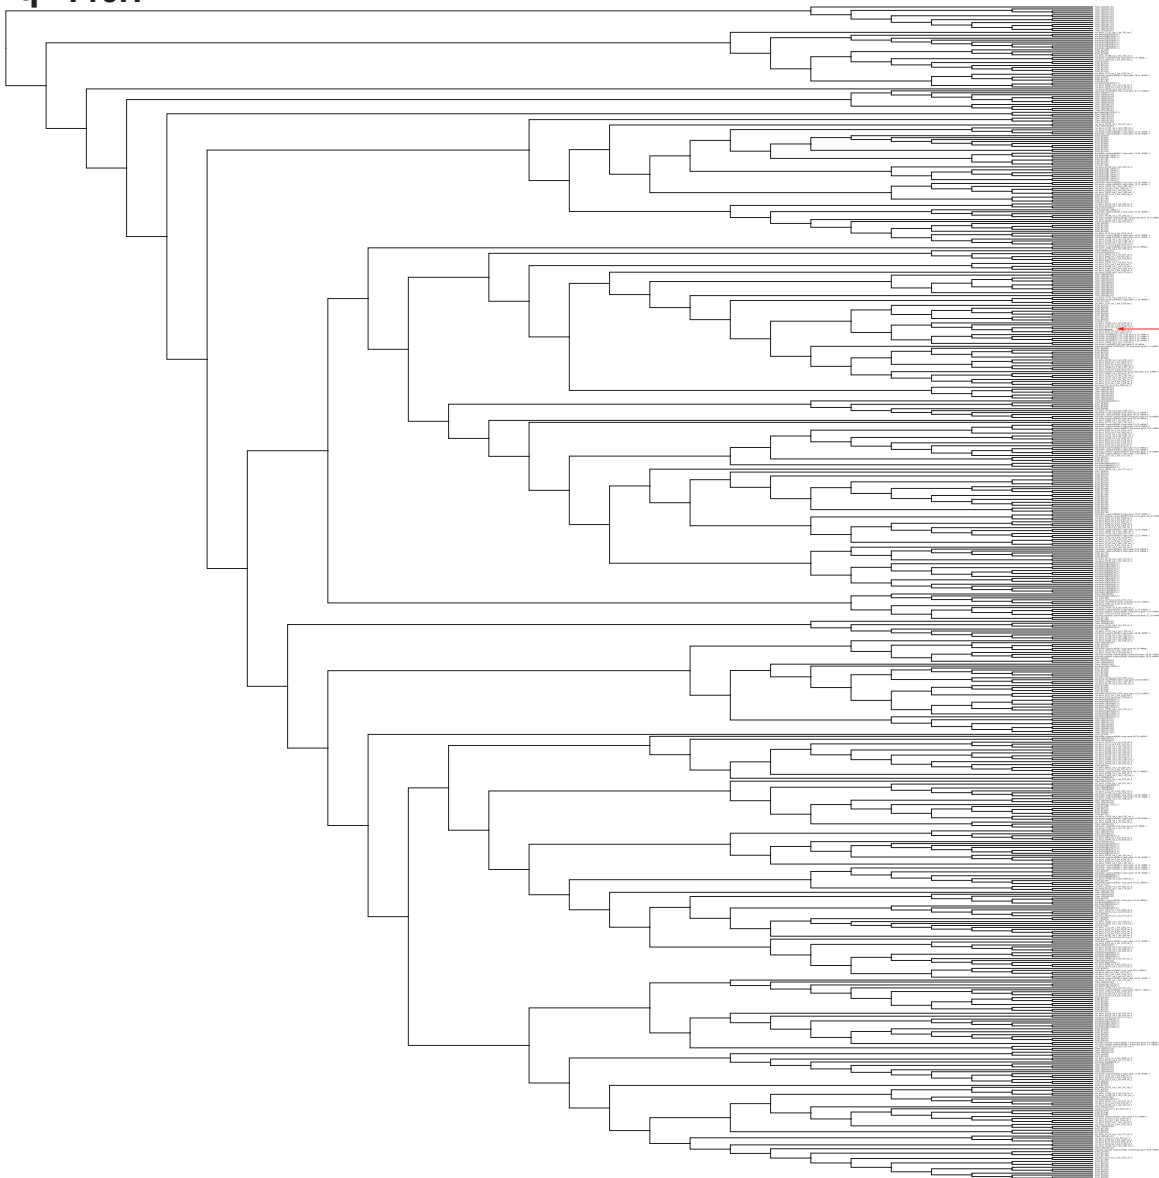



r. T19H

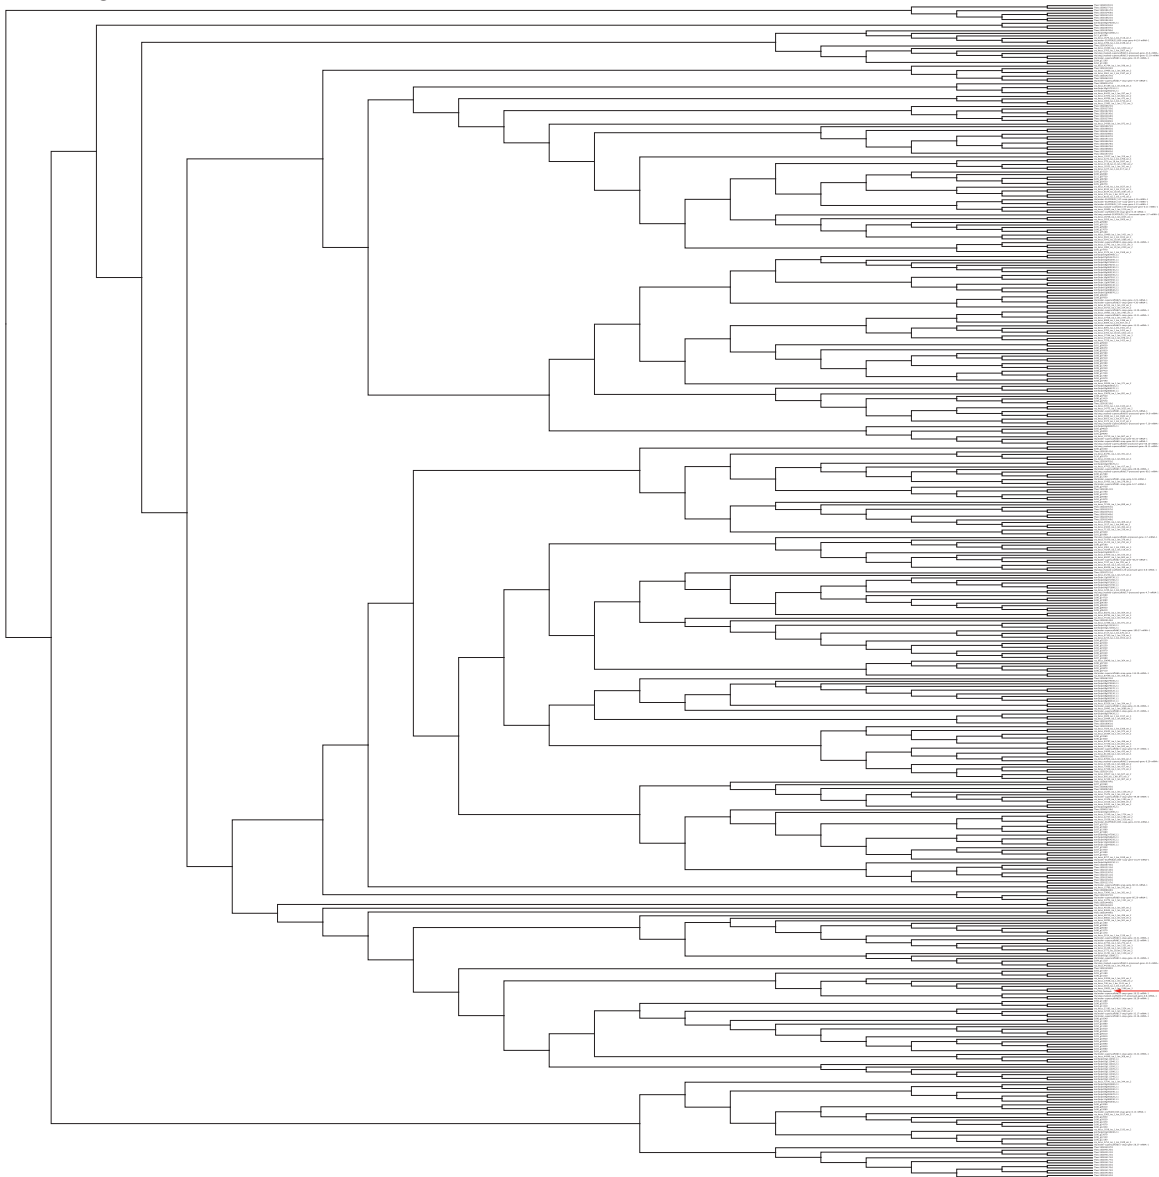

# s. TDC

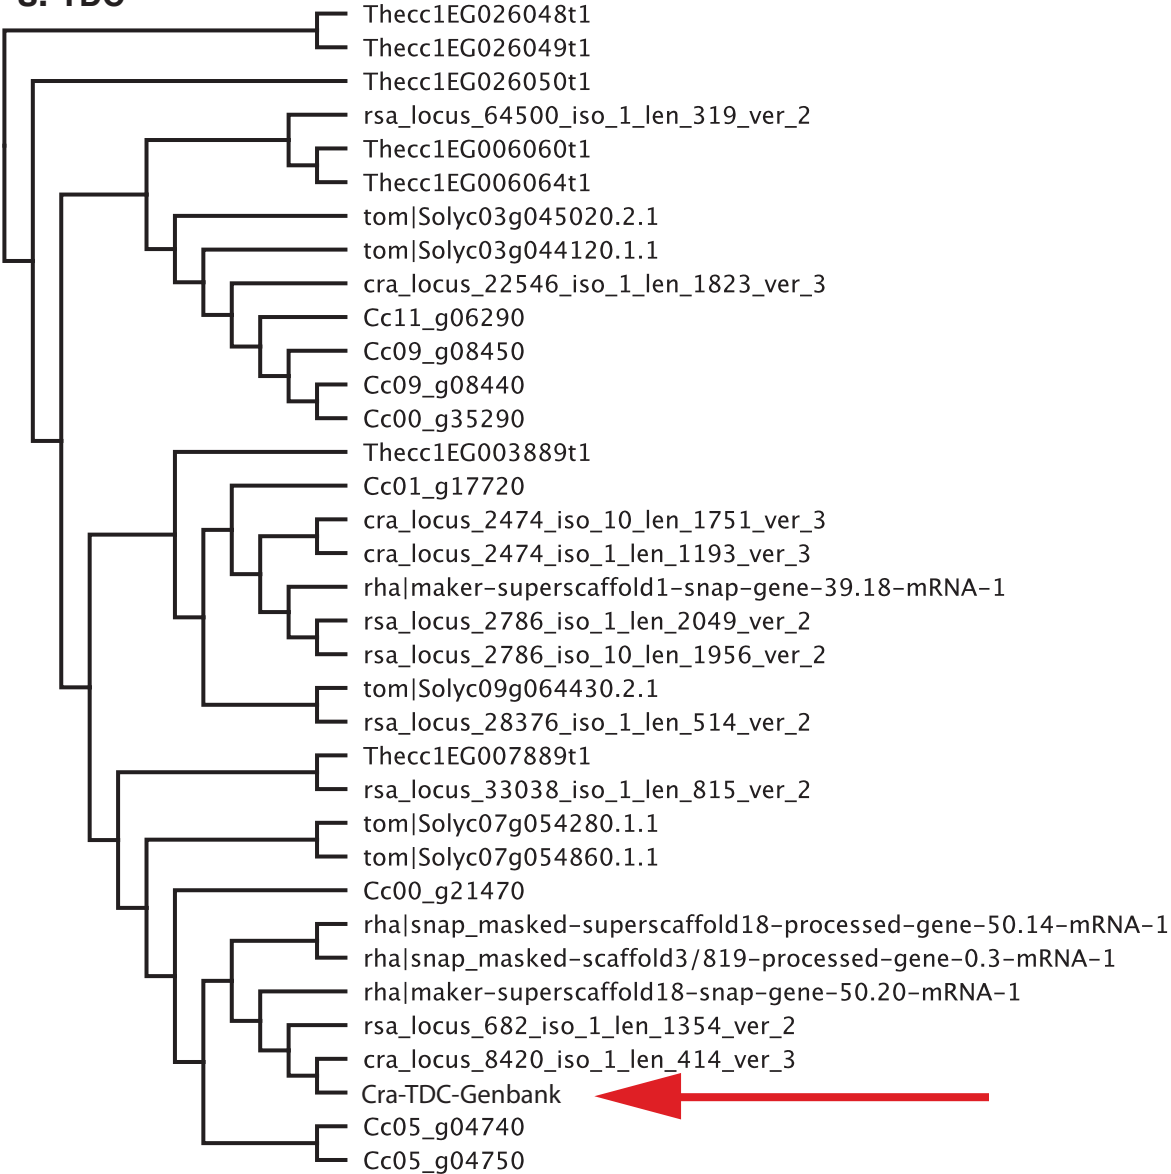

# t. THAS

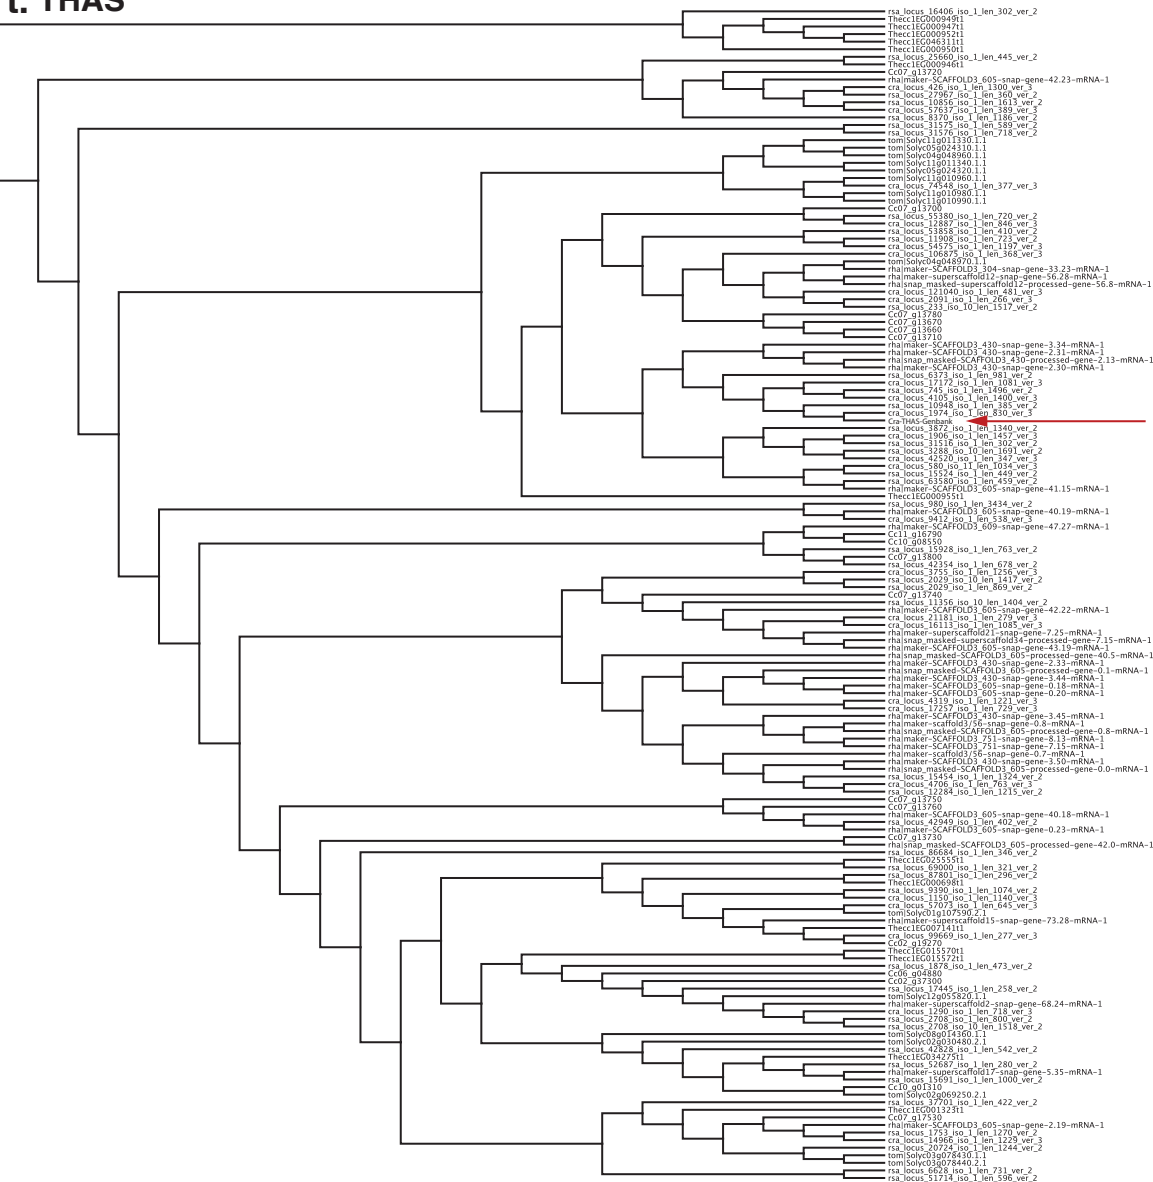

# u. VS

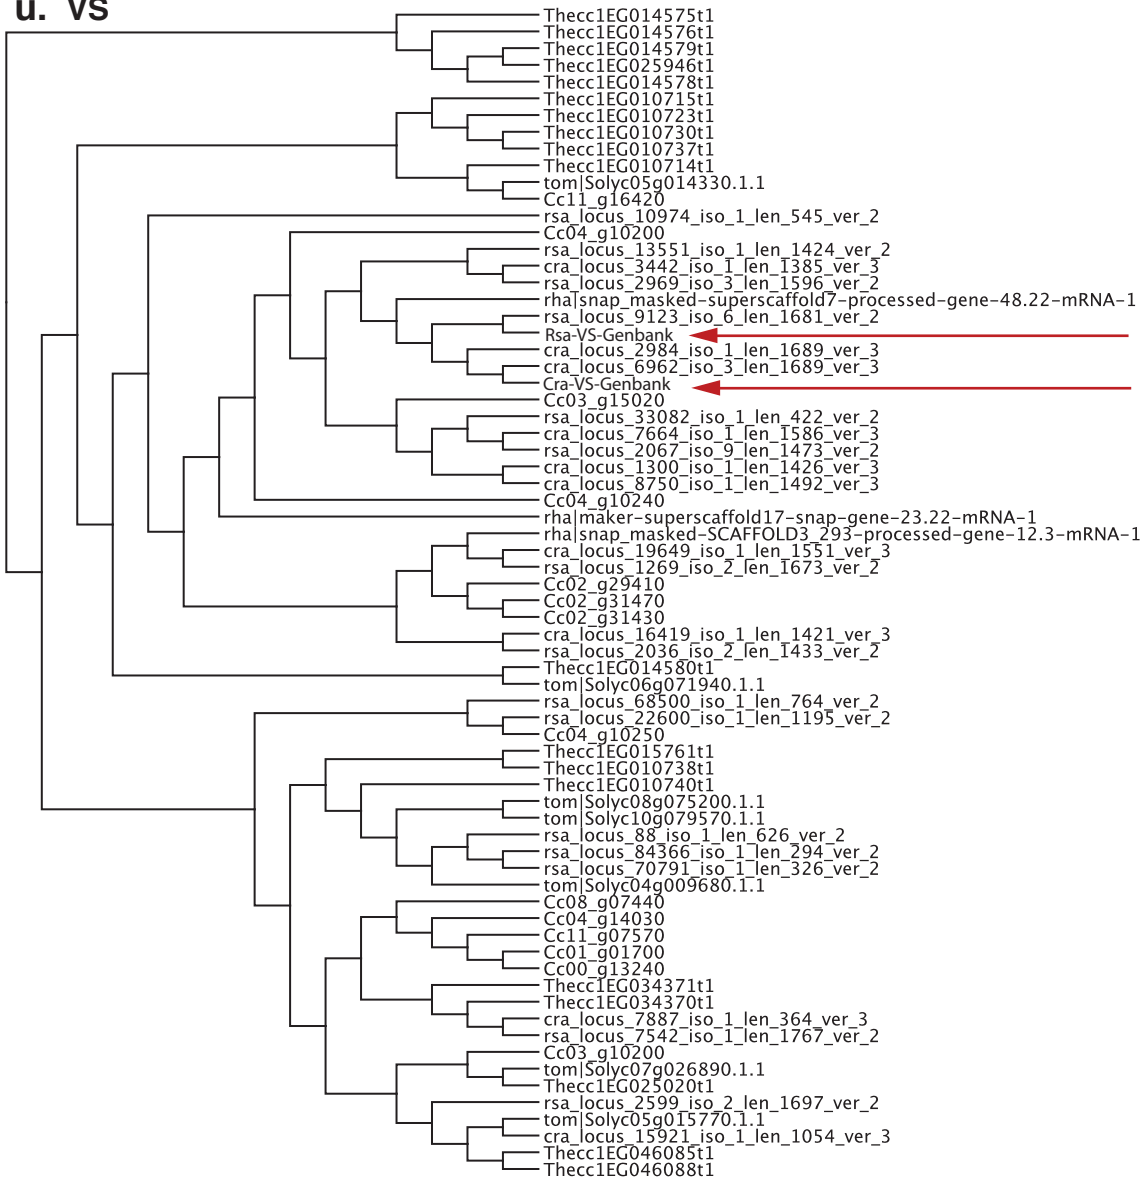

# a. AAE

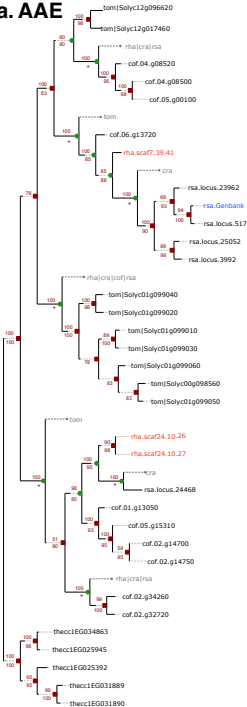

1.14

Duplications : 26-1

Losses : 7

# b. D4H

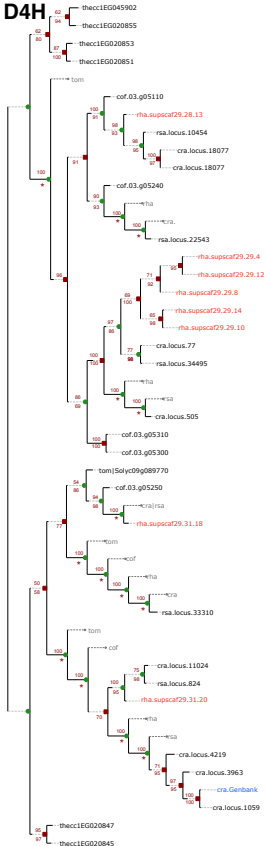

 Duplications : 20 - 1  
 1.43  
 Losses : 14

# C.PNAE

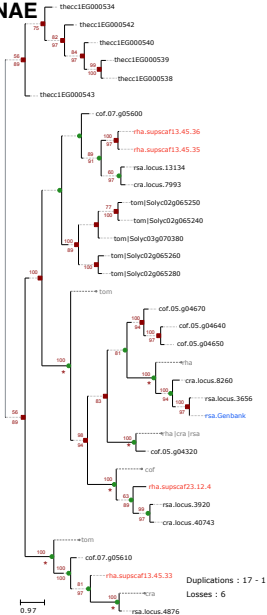

# d. SGD

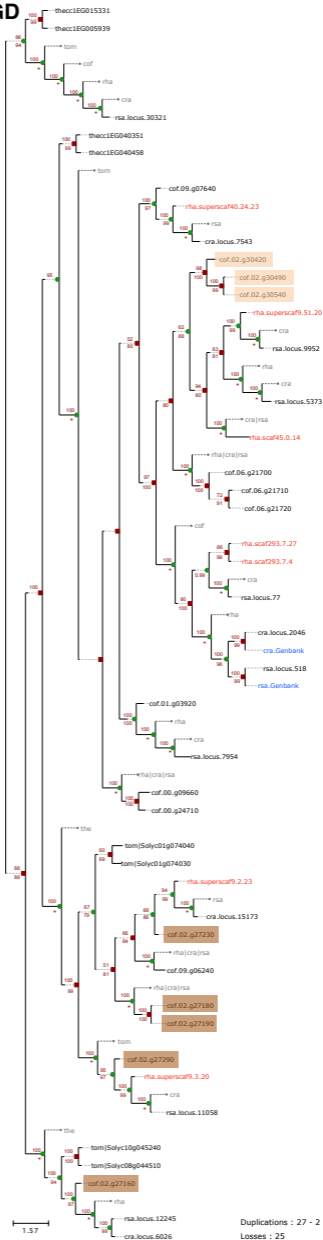



# e. STR

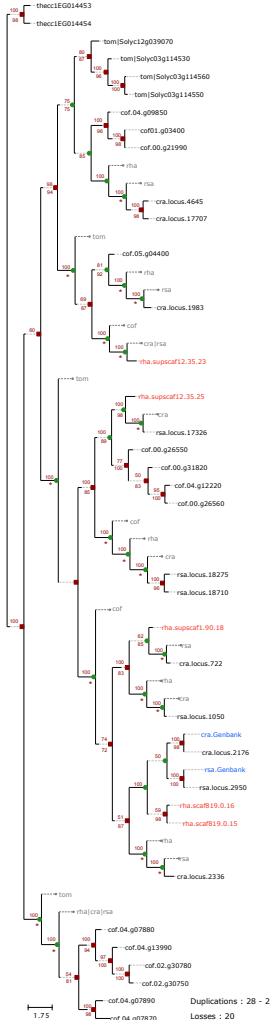

# f. T16H

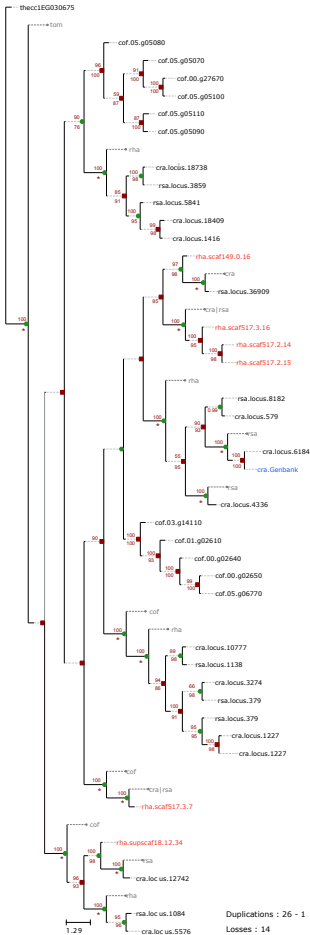

# g.VS

thecc1EG014580

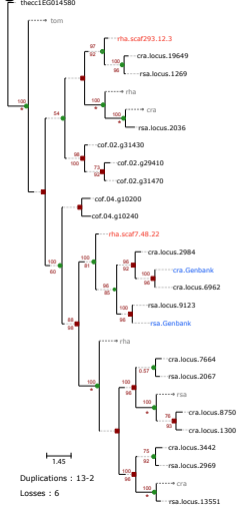

Supplement: srep33782-s1.pdf [file srep33782-s1.pdf]
